# Supplementary material for: Artificial photosynthesis of methanol from carbon dioxide and water via a Nile red-embedded TiO2 photocathode
Source: Royal Society of Chemistry journal article supplement (doi:10.1039/c6ta10231j), 2017-01-01
Supplement: c6ta10231j1.pdf [file c6ta10231j1.pdf]

# Supporting Information

## Artificial Photosynthesis of Methanol from Carbon Dioxide with Water via Nile Reds-embedded TiO<sub>2</sub> Photocathode

*Yongjian Jia<sup>1</sup>, Yanjie Xu<sup>1</sup>, Rong Nie<sup>1</sup>, Fengjuan Chen<sup>1</sup>, Zhenping Zhu<sup>2</sup>, Jianguo Wang<sup>2</sup> and Huanwang Jing<sup>1,2\*</sup>*

<sup>1</sup>State Key Laboratory of Applied Organic Chemistry, College of Chemistry and Chemical Engineering, Lanzhou University, Lanzhou 730000, China

<sup>2</sup>State Key Laboratory of Coal Conversion, Institute of Coal Chemistry, Chinese Academy of Sciences, Taiyuan 030001, China

### Table of Contents

|                                                                                              |     |
|----------------------------------------------------------------------------------------------|-----|
| 1. General.....                                                                              | S2  |
| 2. Synthesis of NRx dye.....                                                                 | S3  |
| 3. Characterization of NRx dyes.....                                                         | S7  |
| 4. Normalized UV-vis absorption & photoluminescence spectra of NRx dyes.....                 | S17 |
| 5. Molecular orbitals of NRx dyes.....                                                       | S19 |
| 6. Preparation of electrodes.....                                                            | S20 |
| 7. X-ray photoelectron spectroscopy (XPS) of Pd/NR2@TiO <sub>2</sub> .....                   | S22 |
| 8. X-ray diffraction (XRD).....                                                              | S23 |
| 9. Cyclic voltammetry and Electrochemical impedance spectroscopy of trielectrode system..... | S24 |
| 10. TEM images of Pd/NR2@TiO <sub>2</sub> Photocathode.....                                  | S26 |
| 11. SEM images of Pd/NR2@TiO <sub>2</sub> Photocathode.....                                  | S27 |
| 12. Mott-Schottky curves.....                                                                | S28 |
| 13. Artificial photosynthetic experiments.....                                               | S31 |
| 14. Selected copies of <sup>1</sup> H NMR spectra of electrolyte.....                        | S32 |
| 15. References.....                                                                          | S35 |

## General:

All reagents and solvents were purchased from commercial sources. THF, toluene and triethylamine were dried over sodium/benzophenone and freshly distilled before use. CH<sub>2</sub>Cl<sub>2</sub> was dried over CaH<sub>2</sub> and freshly distilled prior to use. All other chemicals were of analytical grade.

FTO glass was purchased from Nippon Sheet Glass Co. Ltd. The FTO conducting glass (F: SnO<sub>2</sub>, 15Ω/square) was washed with a detergent solution, deionized water, absolute ethanol, and acetone successively under ultrasonication for 30 min before use.

### *Characterization of NRx dyes*

The <sup>1</sup>H NMR and <sup>13</sup>C NMR spectra of organic compounds were obtained by using Varian 300 MHz spectrometer. Chemical shifts are reported as δ values relative to internal deuterium chloroform (δ 7.27 for <sup>1</sup>H NMR and 77.36 for <sup>13</sup>C NMR) and DMSO-*d*<sub>6</sub> (δ 2.50 for <sup>1</sup>H NMR and 39.00 for <sup>13</sup>C NMR). The following abbreviations were used to explain the multiplicities: s = singlet, d = doublet, t = triplet, m = multiplet.

The high resolution mass spectra were acquired on by using an Orbitrap spectrometer.

The UV-vis absorption spectra were determined by an UV-3600 spectrophotometer in *N,N*-dimethylformamide (DMF) at room temperature. The photoluminescence spectra were obtained by an F-7000 fluorescence spectrophotometer.

All the electrochemical experiments were performed on an electrochemical workstation (CHI660D, CHINA). Electrochemical redox potentials were obtained by cyclic voltammetry using a traditional three-electrode system. The counter electrode was a Pt wire, Ag/AgCl (sat. KCl) was used as a reference electrode. The electrolyte of tetrabutylammoniumhexafluorophosphate (TBAPF<sub>6</sub>, 0.1M) was used for cyclic voltammetry determination.

### *Facilities for Characterization of Photocathode*

Transmission electron microscopy (TEM) and high-resolution transmission electron microscopy (HRTEM) characterization were performed on a Tecnai-G20-F30 electron microscope under accelerating voltage of 300 kV. The X-ray photoelectron spectroscopy (XPS) was recorded on a VG Scientific ESCALB210-XPS photoelectron spectrometer with an Mg Kα X-ray resource. The spectra of various elements were calibrated according to C1s = 284.6 eV. Thermogravimetric analyses (TGA) were carried out with a STA PT1600 thermogravimetric analyzer at a heating rate of 10 °C/min from room temperature to 700°C. The Fourier transform infrared (FT-IR) spectra were recorded with KBr pellets in the range of 4000-400 cm<sup>-1</sup> on a NEXUS 670 spectrometer. X-ray diffraction (XRD) patterns were collected on an X'Pert PRO diffractometer using Cu-Kα radiation (λ = 0.1541 nm) with 2θ ranging from 25° to 80°. EPR spin-trapping experiments were carried out with a Bruker ER200DSRC10/12 spectrometer equipped with a TE 201 resonator (microwave frequency of 9.4 GHz). The electrochemical impedance spectroscopy (EIS) experiments were conducted with amplitude of 5 mV and frequency ranging from 100 kHz to 0.1 Hz in 0.1M KHCO<sub>3</sub> solution (CO<sub>2</sub> saturation). Mott-Schottky analysis was carried out with electrodes of Pd/NRx@TiO<sub>2</sub>, a platinum electrode, an Ag/AgCl (Sat. KCl) electrode and non-CO<sub>2</sub> pumped 0.1 M KHCO<sub>3</sub> solution used as a working electrode, counter electrode, reference electrode and electrolyte, respectively.

## Synthesis of NRx dyes

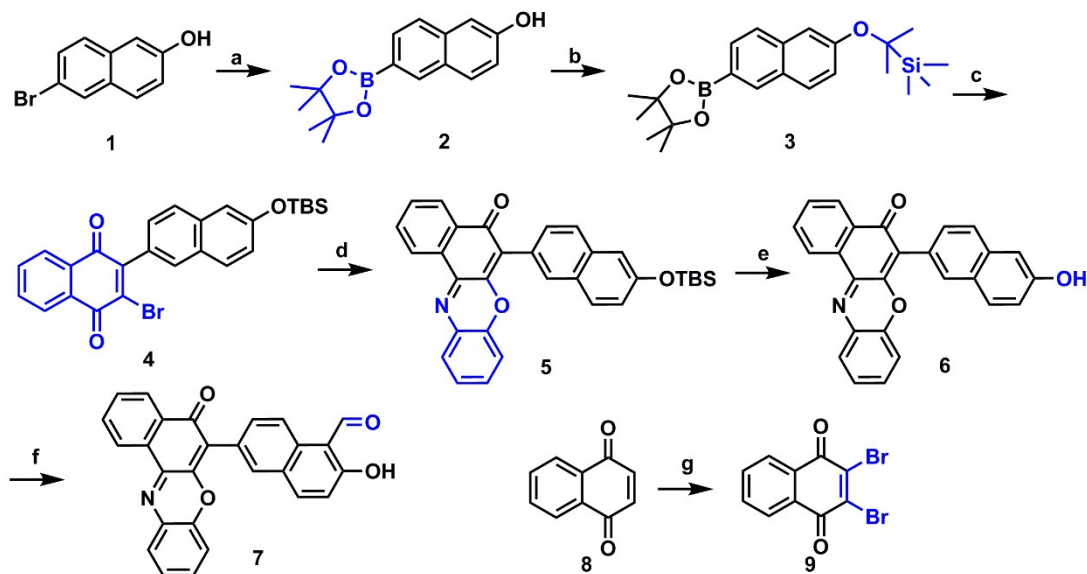

a, Pd(dppf)<sub>2</sub>Cl<sub>2</sub>, KOAc, 1,4-dioxane, 90%; b, TBSCl, Imidazole, CH<sub>2</sub>Cl<sub>2</sub>, 99%; c, Pd(PPh<sub>3</sub>)<sub>4</sub>, K<sub>2</sub>CO<sub>3</sub>, THF, H<sub>2</sub>O, 57%, Suzuki Cross-Coupling; d, 2-aminophenol, K<sub>2</sub>CO<sub>3</sub>, 95% Ethanol, Reflux 70%, Michael addition reaction; e, n-Bu<sub>4</sub>NF, Dry THF, 99%; f, CF<sub>3</sub>COOH, HMTA, Reflux, 80%, g, CH<sub>3</sub>COOH, Br<sub>2</sub>, 98%.

### The preparation of intermediates and NR2 dye:

#### 6-(4,4,5,5-Tetramethyl-1,3,2-dioxaborolan-2-yl)naphthalen-2-ol (2) [S1]

The 6-bromonaphthalen-2-ol (2.02g, 9.1mmol, 1 eq.), potassium acetate (2.7g, 27mmol, 3 eq.), and bis(pinacolato)diboron (2.5g, 10mmol, 1.1 eq.) were dissolved in dry dioxane, and the resulting mixtures were degassed with a stream of Ar. After 10 min, Pd(dppf)<sub>2</sub>Cl<sub>2</sub> (0.3g, 0.05 eq.) was added. The resulting mixture was heated to 90°C, and stirred under Ar for 24h until the reaction is complete, which was monitored by TLC. Then the solution was cooled to room temperature and then evaporated to dryness under reduced pressure. The residue was purified by chromatography using petroleum ether/ ethyl acetate 10:1 as eluant and yielded the product as a white solid (90%).

<sup>1</sup>H NMR (300 MHz, CDCl<sub>3</sub>) δ 8.29 (s, 1H, phenyl), 7.81-7.75 (m, 3H, phenyl), 7.64 (d, *J* = 8.3 Hz, 1H, phenyl), 7.12 (d, *J* = 2.5 Hz, 1H, phenyl), 7.10 (d, *J* = 2.5 Hz, 1H, phenyl), 7.07 (d, *J* = 2.5 Hz, 1H, phenyl), 5.34 (s, 1H, OH), 1.39(s, 12H, CH<sub>3</sub>);

<sup>13</sup>C NMR (75 MHz, CDCl<sub>3</sub>) δ 136.16, 131.12, 130.75, 125.52, 117.73, 109.37, 83.88, 77.42, 77.00, 76.58, 24.88.

#### Trimethyl(2-((6-(4,4,5,5-tetramethyl-1,3,2-dioxaborolan-2-yl)naphthalene-2-yl)oxy)propan-2-yl)silane (3) [S2]

Compound 2(2.95g, 11 mmol) were dissolved in dry CH<sub>2</sub>Cl<sub>2</sub> and cooled to 0 °C. *tert*-Butyldimethylsilyl chloride (2g, 13.2 mmol, 1.2 eq.) and imidazole (2.2g, 33mmol, 3 eq.) were added under Ar atmosphere. The solution was allowed to warm to room temperature for 12 hours. Water was added to quench the reaction and the mixture extracted with CH<sub>2</sub>Cl<sub>2</sub>. The combined organic layers were dried over MgSO<sub>4</sub>, filtered and concentrated under reduced pressure. A white solid was gained quantitatively and could be used without further purification.

<sup>1</sup>H NMR (300 MHz, CDCl<sub>3</sub>) δ 8.31 (s, 1H, phenyl), 7.82-7.76 (m, 2H 8.2 Hz, 1H, phenyl), 7.19 (d, *J* = 2.2 Hz, 1H, phenyl), 7.15-7.04 (m, 1H, phenyl), 1.39 (s, 12H, CH<sub>3</sub>), 1.03 (d, *J* = 1.0 Hz, 9H, Si-CH<sub>3</sub>), 0.26 (d, *J* = 1.0 Hz, 6H, SiC-CH<sub>3</sub>).

$^{13}\text{C}$  NMR (75 MHz,  $\text{CDCl}_3$ )  $\delta$  136.15, 130.89, 130.34, 125.95, 122.17, 114.86, 83.90, 77.58, 77.16, 76.74, 25.84, 25.03, -4.17.

HRMS ( $m/z$ , FAB+) calcd for  $\text{C}_{22}\text{H}_{33}\text{BO}_3\text{Si}$ ,  $[\text{M}+\text{H}]$ : 385.2365; found, 385.2351.

**3-Bromo-6'-((*tert*-butyldimethylsilyl)oxy)-[2,2'-binaphthalene]-1,4-dione, (4). [S3]**

In a 100ml Schlenk tube, 2,3-dibromonaphthalene-1,4-dione (Compound **9**, 2.6g, 8.34mmol, 1 eq.) and Compound **3** (1.6g, 4.17mmol, 2.2 eq.) were dissolved in 20 ml of Toluene.  $\text{Pd}(\text{PPh}_3)_4$  (0.34g, 0.05 eq.), 2 M aqueous solution of  $\text{K}_2\text{CO}_3$  (5 eq.) was added and the reaction mixture was freeze-dried by liquid nitrogen for 3 times, and then the reaction was heated at 90 °C for 48h. The solution was then diluted with water and extracted with ethyl acetate. The combined organic layers were dried over  $\text{Na}_2\text{SO}_4$ , filtered and concentrated under reduced pressure. The residue was purified by chromatography using petroleum ether/ ethyl acetate 250:1 as eluent. The target product was obtained as a red solid in 57% yield after evaporation of solvent and dry in a vacuum desiccator.

$^1\text{H}$  NMR (300 MHz,  $\text{CDCl}_3$ )  $\delta$  8.29-8.25 (m, 1H, phenyl), 8.21 – 8.17 (m, 1H, phenyl), 7.85-7.78 (m, 6H, naphthyl), 7.40 (d,  $J$  = 8.7 Hz, 1H, phenyl), 7.15 (d,  $J$  = 8.7 Hz, 1H, phenyl), 1.05 (s, 9H,  $\text{Si}-\text{CH}_3$ ), 0.29 (s, 6H,  $\text{SiC}-\text{CH}_3$ ).

$^{13}\text{C}$  NMR (75 MHz,  $\text{CDCl}_3$ )  $\delta$  181.89, 178.43, 154.86, 149.83, 139.10, 134.95, 134.50, 134.21, 131.71, 131.27, 130.22, 129.41, 129.34, 128.47, 127.67, 127.55, 126.90, 126.52, 122.88, 115.07, 25.85, 18.44, 1.17, -4.16.

ESI-HRMS ( $m/z$ ), Calcd for  $\text{C}_{26}\text{H}_{25}\text{BrO}_3\text{Si}$ ,  $[\text{M}+\text{H}]$ : 493.0829; found: 493.0809.

**6-(6-((*tert*-Butyldimethylsilyl)oxy)naphthalen-2-yl)-5*H*-benzo[a]phenoxazin-5-one (5) [S4]**

Compound **4** (3.54, 7.2mmol, 1eq) was added to the solution in 2-amino phenol (0.78 g, 7.2mmol, 1eq) in 95 % of ethanol (50mL). A catalytic amount of anhydrous potassium carbonate was added to the reaction mixture and it was refluxed for 2 h under argon. The reaction mixture was cooled to room temperature, and filtered by vacuum filtration, and the precipitate was washed with 95 % of ethanol, dried in vacuum. A red solid was gained in 70% yield.

$^1\text{H}$  NMR (300 MHz,  $\text{CDCl}_3$ )  $\delta$  8.79 (d,  $J$  = 7.5 Hz, 1H, phenyl), 8.39 (d,  $J$  = 7.5 Hz, 1H, phenyl), 7.98 (s, 1H), 7.81 (dd,  $J$  = 14.8, 7.2 Hz, 5H, naphthyl), 7.57 (d,  $J$  = 8.2 Hz, 1H, phenyl), 7.36 (dd,  $J$  = 16.2, 7.6 Hz, 2H, phenyl), 7.18-7.08 (m, 2H, phenyl), 1.04 (s, 9H,  $\text{Si}-\text{CH}_3$ ), 0.28 (s, 6H,  $\text{SiC}-\text{CH}_3$ );

$^{13}\text{C}$  NMR (75 MHz,  $\text{CDCl}_3$ )  $\delta$  182.77, 154.17, 147.54, 147.08, 147.04, 144.22, 134.45, 132.99, 132.17, 132.12, 132.00, 131.42, 131.16, 130.19, 130.01, 129.69, 129.12, 128.70, 126.63, 126.27, 125.30, 124.65, 122.29, 119.48, 116.19, 115.02, 28.02, 25.91, 18.48, 1.18, -4.13.

ESI-HRMS ( $m/z$ ), Calcd for  $\text{C}_{32}\text{H}_{29}\text{NO}_3\text{Si}$ ,  $[\text{M}+\text{H}]$ : 504.1989; found: 504.1974.

**6-(6-Hydroxynaphthalen-2-yl)-5*H*-benzo[a]phenoxazin-5-one, (6).**

Compound **5** (0.31g, 0.62g, 1 eq.) was dissolved in dry THF and cooled to 0 °C. Tetrabutylammonium fluoride (0.46g, 1.73mmol, 2.5eq. of 1M in THF) were added under Ar atmosphere and the reaction was then warmed to room temperature for 5h. Saturated ammonium chloride was added. The mixture was extracted with ethyl acetate. The organic layer was washed with brine, then dried with  $\text{MgSO}_4$ , filtered and concentrated under reduced pressure. The dark red solid was obtained in 97% yield by recrystallization with THF/*n*-hexane (1:1, v/v).

$^1\text{H}$  NMR (300 MHz,  $d_6$ -DMSO)  $\delta$  9.85 (s, 1H, OH), 8.73 (d,  $J$  = 7.3 Hz, 1H), 8.24 (d,  $J$  = 7.2 Hz, 1H), 7.93 (dd,  $J$  = 16.9, 10.7 Hz, 4H, naphthyl), 7.79 (dd,  $J$  = 15.0, 8.8 Hz, 2H), 7.51 (d,  $J$  = 8.3 Hz, 2H), 7.43 (t,  $J$  = 7.6 Hz, 1H), 7.26 – 7.17 (m, 2H), 7.13 (d,  $J$  = 8.8 Hz, 1H).

$^{13}\text{C}$  NMR (101 MHz,  $d_6$ -DMSO)  $\delta$  181.44, 155.84, 146.67, 146.65, 143.54, 134.08, 132.17, 132.10, 131.84, 131.63, 131.26, 130.43, 129.81, 129.70, 129.08, 128.66, 127.26, 125.61, 125.21,

125.06, 125.00, 124.04, 118.60, 118.24, 115.72, 108.55.

ESI-HRMS ( $m/z$ ), Calcd for  $C_{26}H_{15}NO_3$ ,  $[M+H]^+$ : 390.1125; found: 390.1111.

### 2-Hydroxy-6-(5-oxo-5H-benzo[a]phenoxazin-6-yl)-1-naphth-aldehyde; (7, NR2).

To a solution of compound 15 (2.23g, 13.4 mmol) in trifluoroacetic acid (TFA, 30 mL), hexamethylenetetramine (HTMA, 1.88g, 13.4mmol, 1eq) was added at room temperature. The mixture was then heated to 90 °C and kept for 24h. After cooling to the room temperature, diluted hydrochloric acid was added, stirred for 30min. The precipitate was filtered, washed with water and dried in vacuum to give a dark-red solid in 80% yield.

$^1H$  NMR (300 MHz,  $d_6$ -DMSO)  $\delta$  12.11 (s, 1H, CHO), 10.85 (s, 1H, OH), 8.99 (s, 1H), 8.66 (s, 1H), 8.00 (s, 1H, naphthyl), 7.43 (m, 3H), 7.25 (s, 1H), 7.18 (s, 2H), 6.99 (m, 1H).

$^{13}C$  NMR ( $d_6$ -DMSO, 101 MHz)  $\delta$  194.25, 181.83, 159.03, 158.66, 147.37, 144.46, 132.85, 132.59, 132.28, 131.91, 131.50, 131.14, 130.98, 129.80, 126.19, 125.96, 124.74, 124.60, 121.67, 117.70, 114.71, 107.80, 105.49.

ESI-HRMS ( $m/z$ ), Calcd for  $C_{27}H_{15}NO_4$ ,  $[M+H]^+$ : 418.1074; found: 418.1059.

### 2,3-Dibromonaphthalene-1,4-dione, (9) [S5]

To a solution of naphthalene-1,4-dione (compound 8, 10 g, 63 mmol) in glacial acetic acid, liquid bromine (6.50 mL, 126 mmol, 2eq) was added dropwise. The resulting solution was stirred at room temperature for 30 min and then heated to 110 °C. After 8 h reaction at this temperature, the mixture was poured into 250 mL ice-water, the precipitate was formed, filtered and washed with water and dried under vacuum. The pure product was gained as yellow solid in 98% yield.

$^1H$  NMR (300 MHz,  $CDCl_3$ )  $\delta$  8.18 (dd,  $J$  = 5.7, 3.3 Hz, 1H), 7.78 (dd,  $J$  = 5.7, 3.2 Hz, 1H);

$^{13}C$  NMR (75 MHz,  $CDCl_3$ )  $\delta$  175.96, 142.70, 134.67, 130.88, 128.36, 109.91.

## Preparation of NR1, NR3 & NR4 Dyes.

The dyes were prepared referring to a literature procedure [S6].

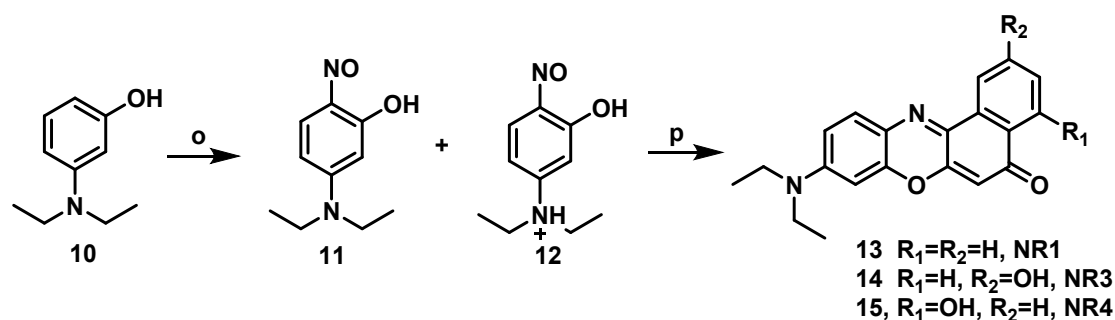

$o$ ,  $NaNO_2$ , HCl, Ethanol,  $H_2O$ , 90%;  $p$ , 1-Naphthol/naphthalene-1,6-diol/ 1,8-naphthalenediol, DMF, 80°C, 23%.

### 5-(Diethylamino)-2-nitrosophenol (11)

3-Diethylaminophenol (12.02 g, 72.6 mmol) was dissolved in a mixture of 26 mL of conc. HCl and 16 mL of distilled water. An aqueous solution of  $NaNO_2$  (5.01 g, 72.6mmol) was added to the obtained solution in a bath of ice-water. The reaction mixture was then stirred for 4 h at 0–5 °C. The precipitate was filtered, dried in vacuum. The residue was recrystallized with a mixture of ethanol and diethylether (1:1, V/V), a mixture of 11 and 12 was obtained as a yellow powder.

A DMF solution of 5-diethylamino-2-nitrosophenol hydrochloride (1.14 g, 4.94mmol) and 1,6-dihydroxynaphthalene (0.19 g, 4.94 mmol) were merged into an oil bath at 80°C for 4 h. The DMF

was then removed under reduced pressure. The target product was gained after further purification by chromatography using petroleum ether/ ethyl acetate 1:2.

# Copy $^1\text{H}$ NMR of Compound 2

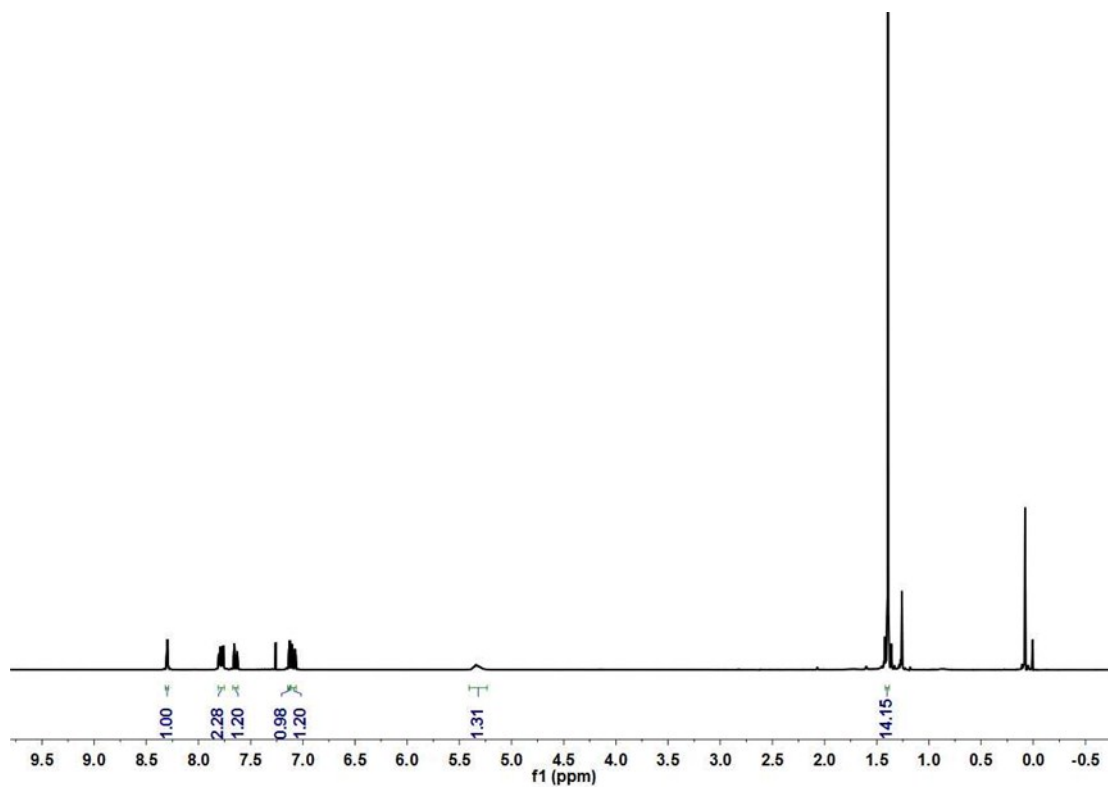

# Copy $^{13}\text{C}$ NMR of Compound 2

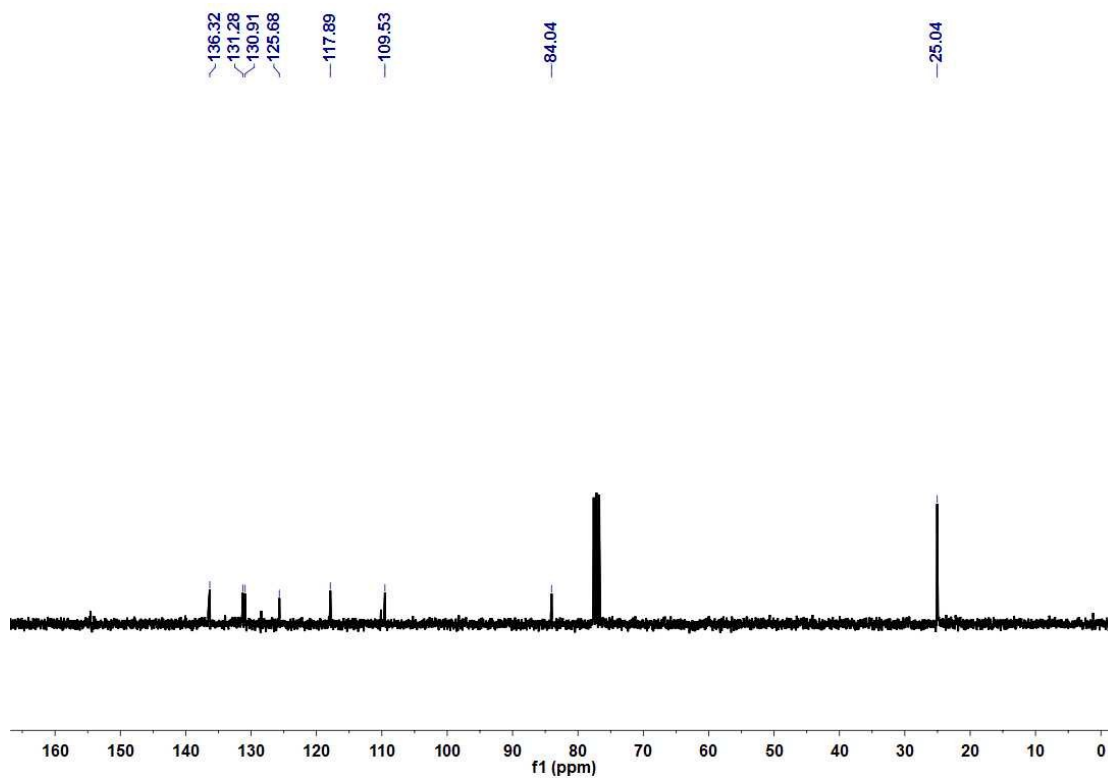

# Copy $^1\text{H}$ NMR of Compound 3

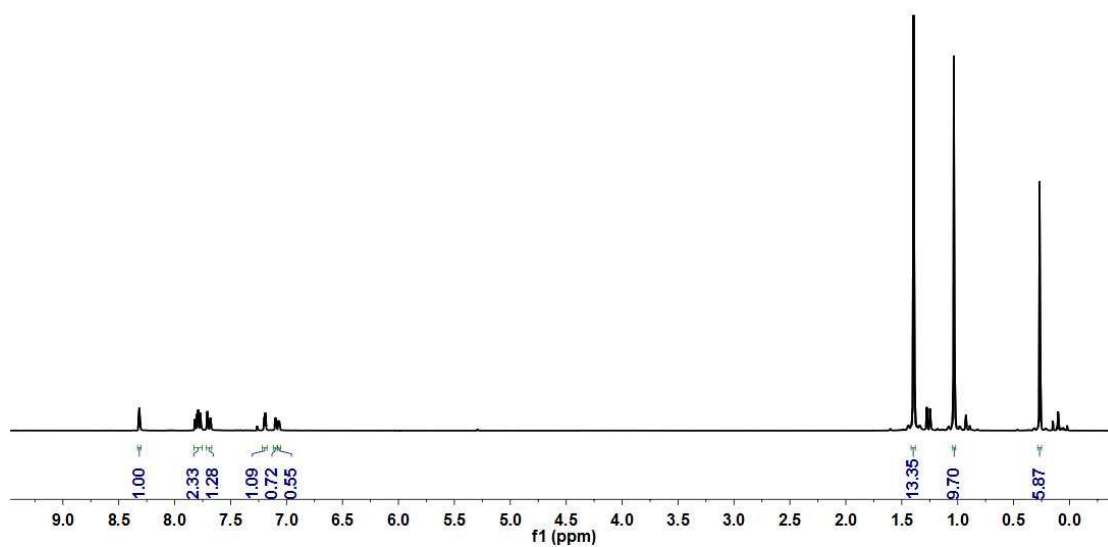

# Copy $^{13}\text{C}$ NMR of Compound 3

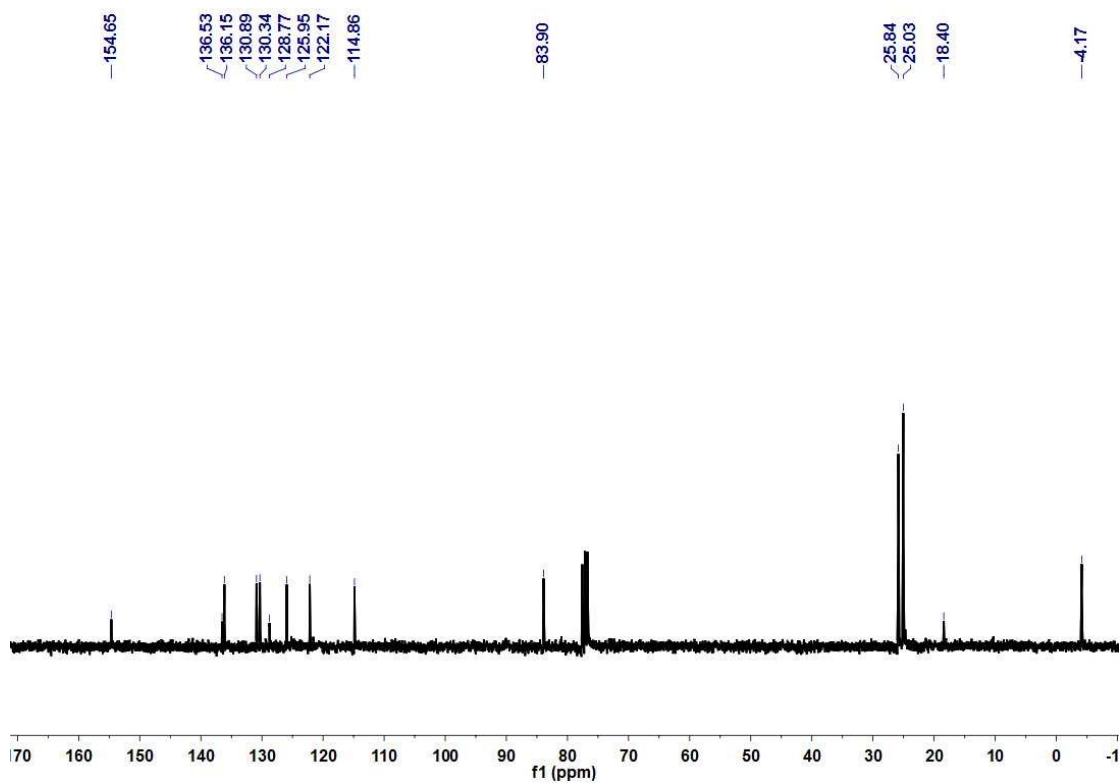

## Copy HRMS of Compound 3

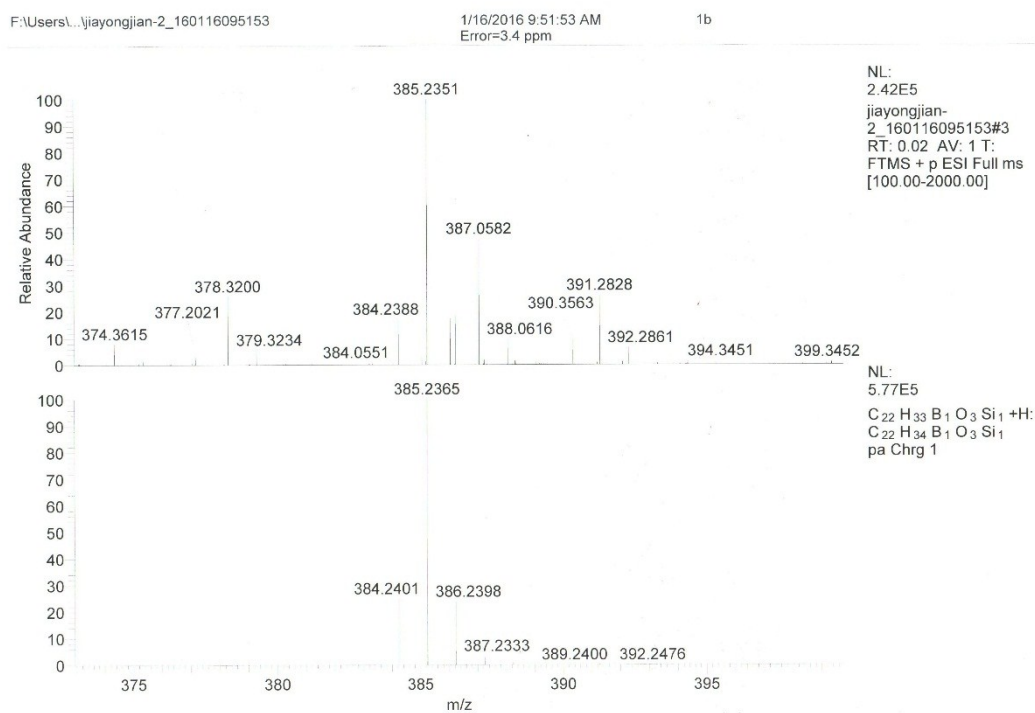

## Copy <sup>1</sup>H NMR of Compound 4

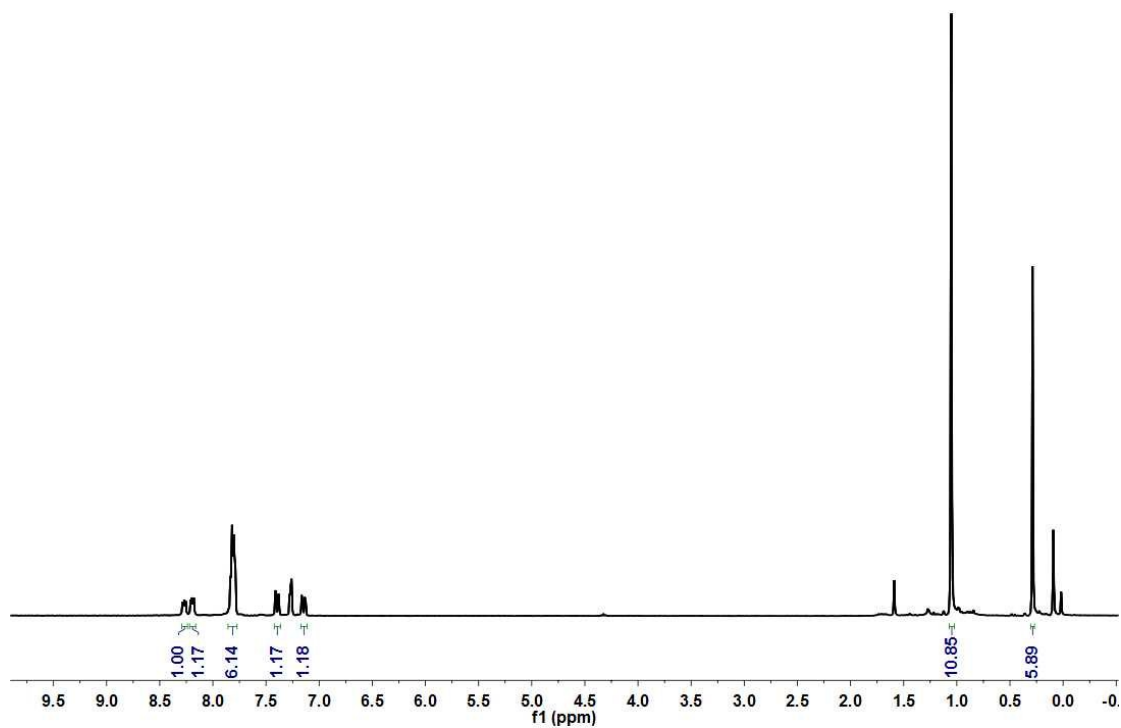

# Copy $^{13}\text{C}$ NMR of Compound 4

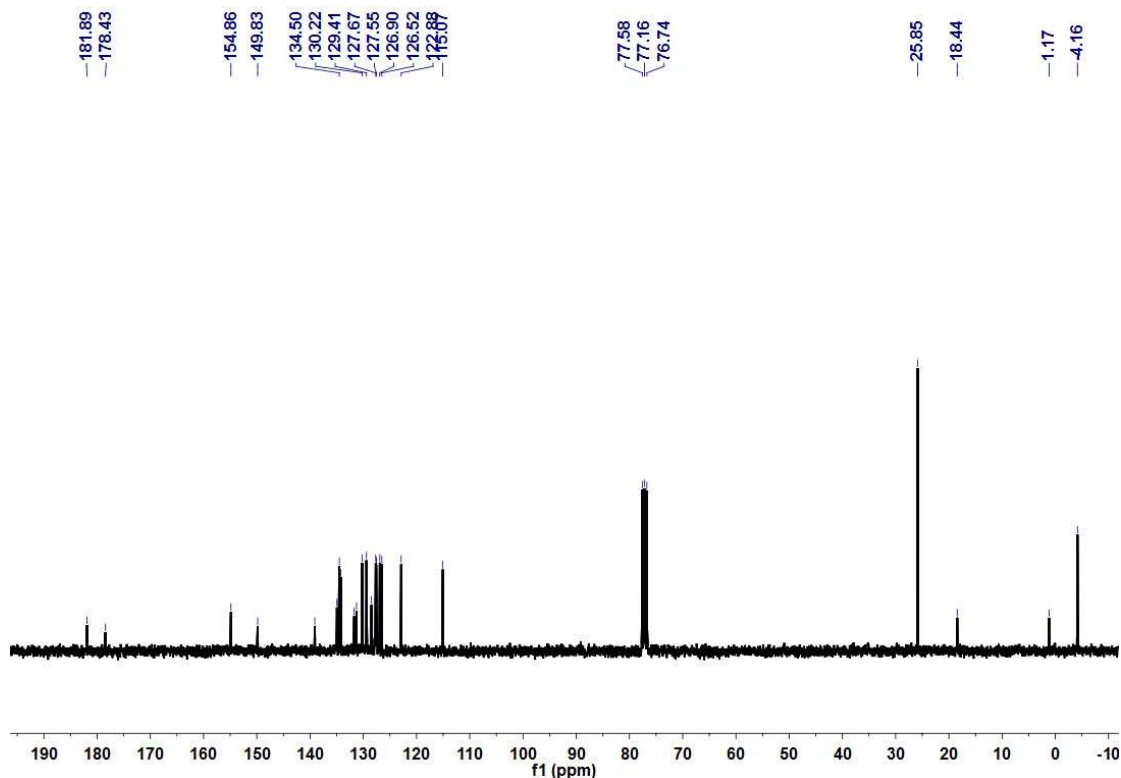

# Copy HRMS of Compound 4

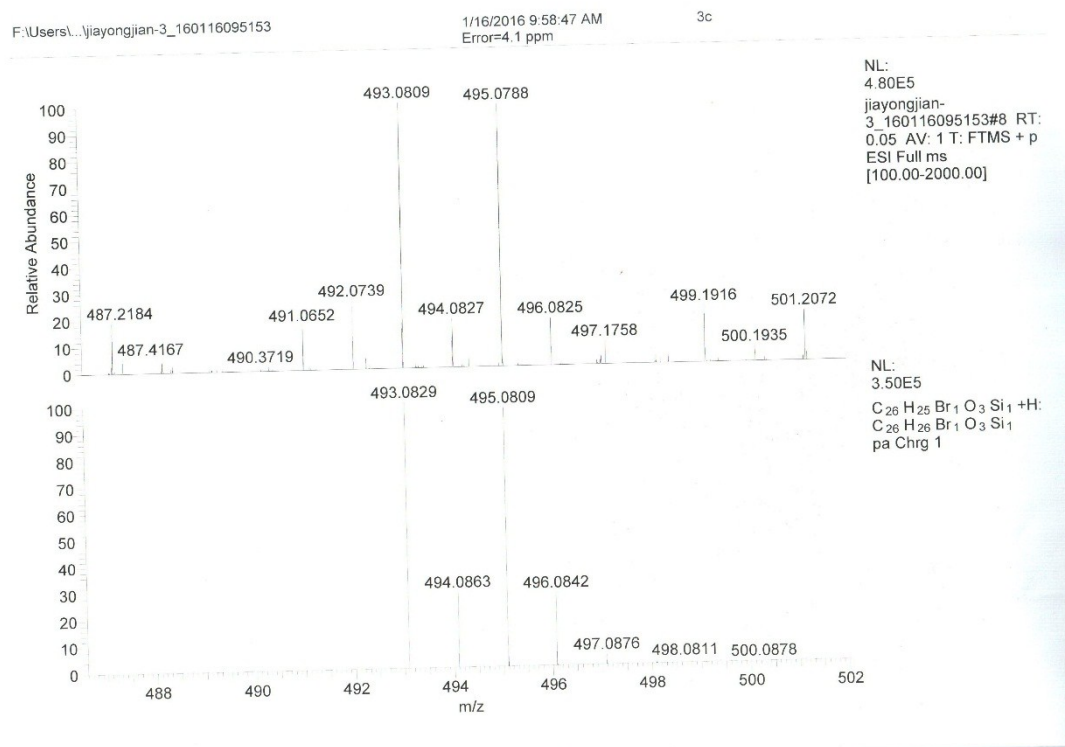

# Copy of $^1\text{H}$ NMR Compound 5

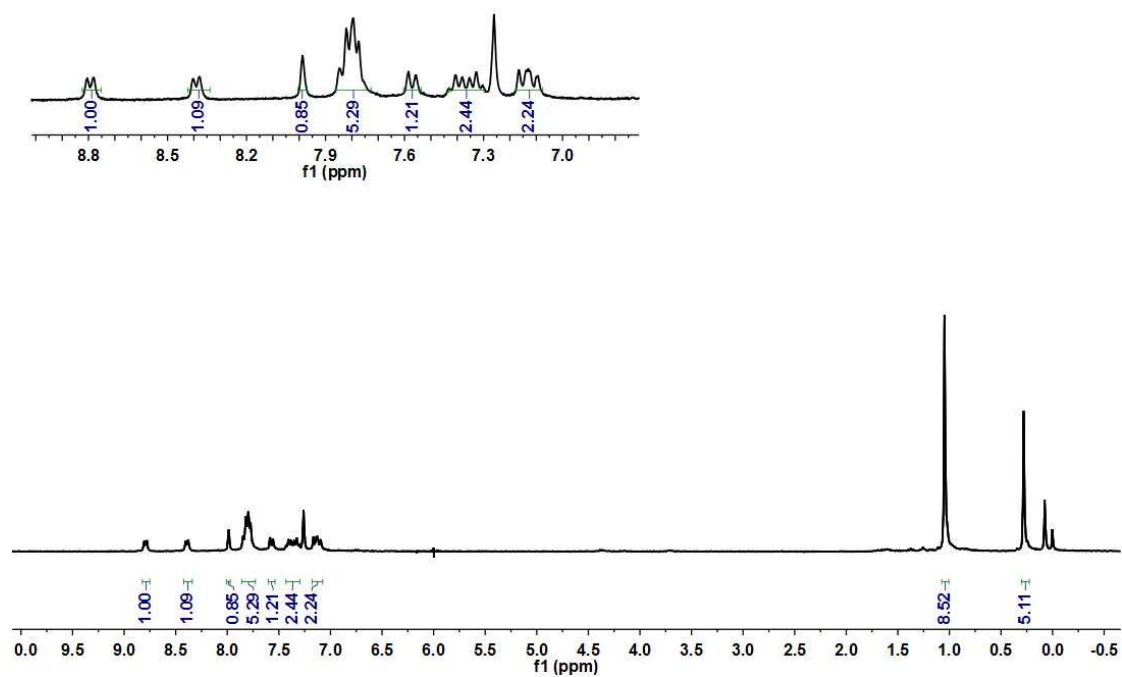

# Copy of $^{13}\text{C}$ NMR Compound 5

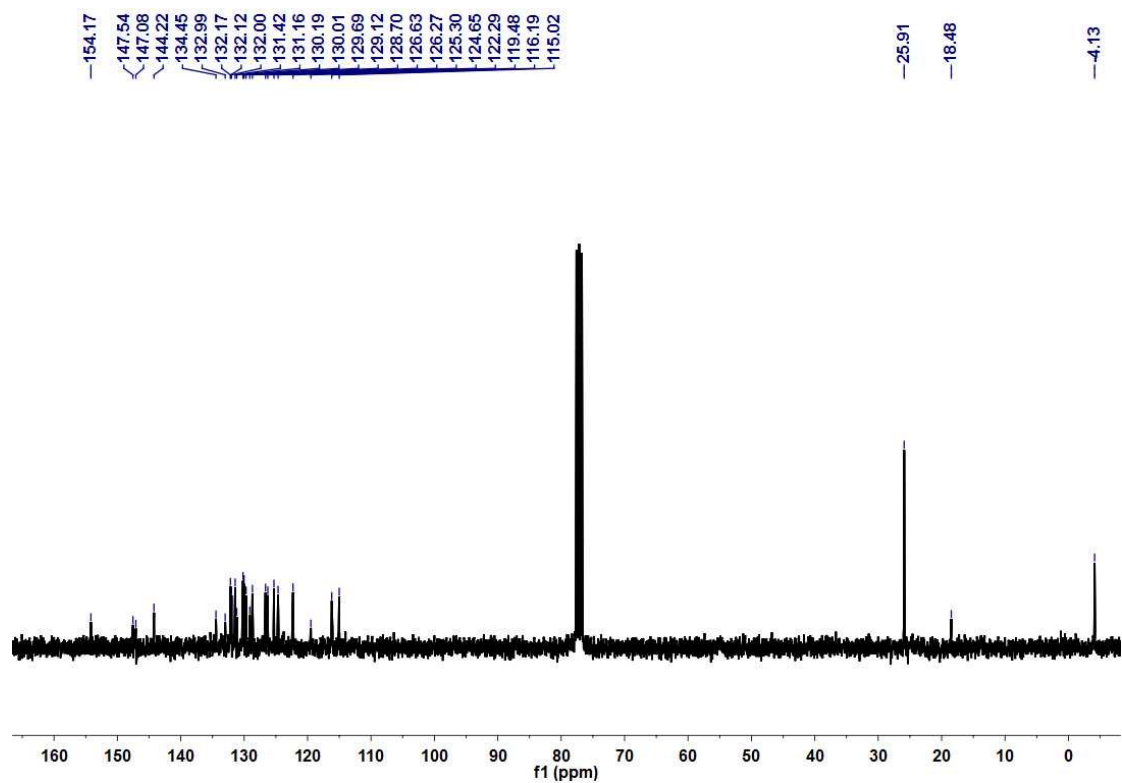

## Copy HRMS of Compound 5

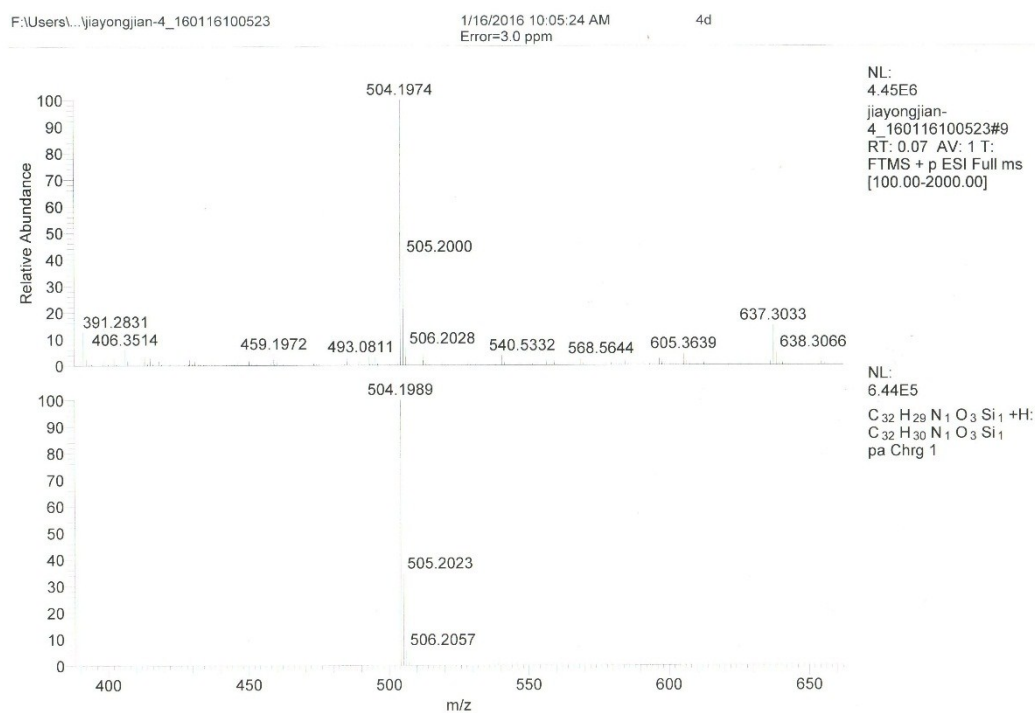

## Copy <sup>1</sup>H NMR of Compound 6

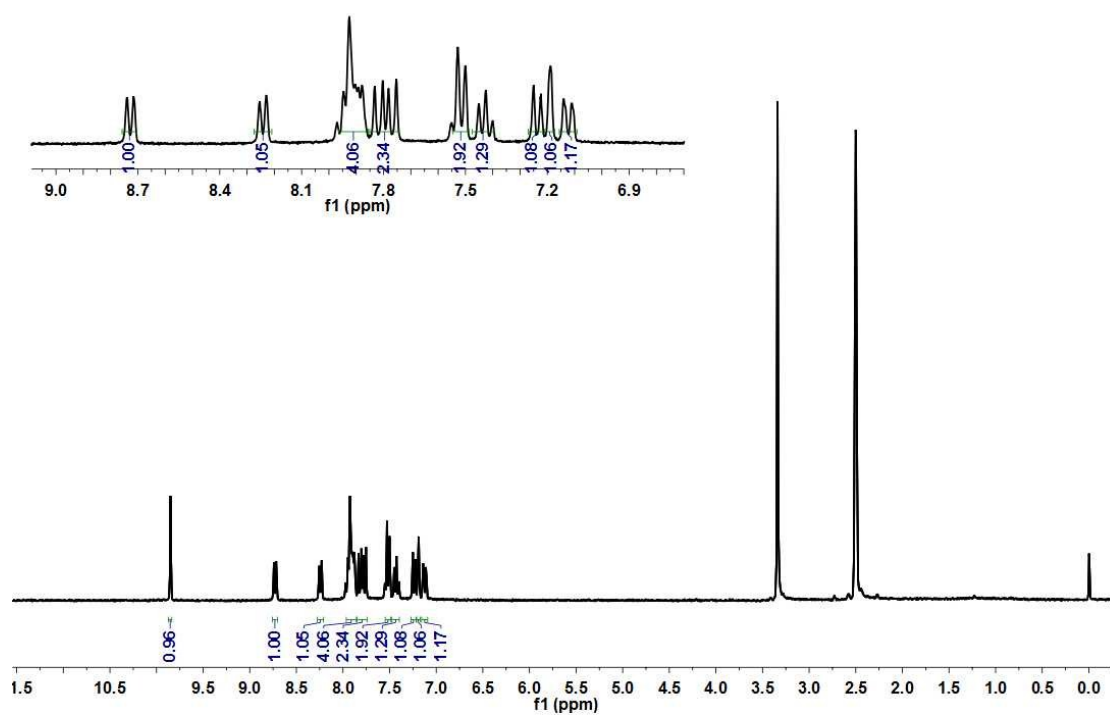

# Copy $^{13}\text{C}$ NMR of Compound 6

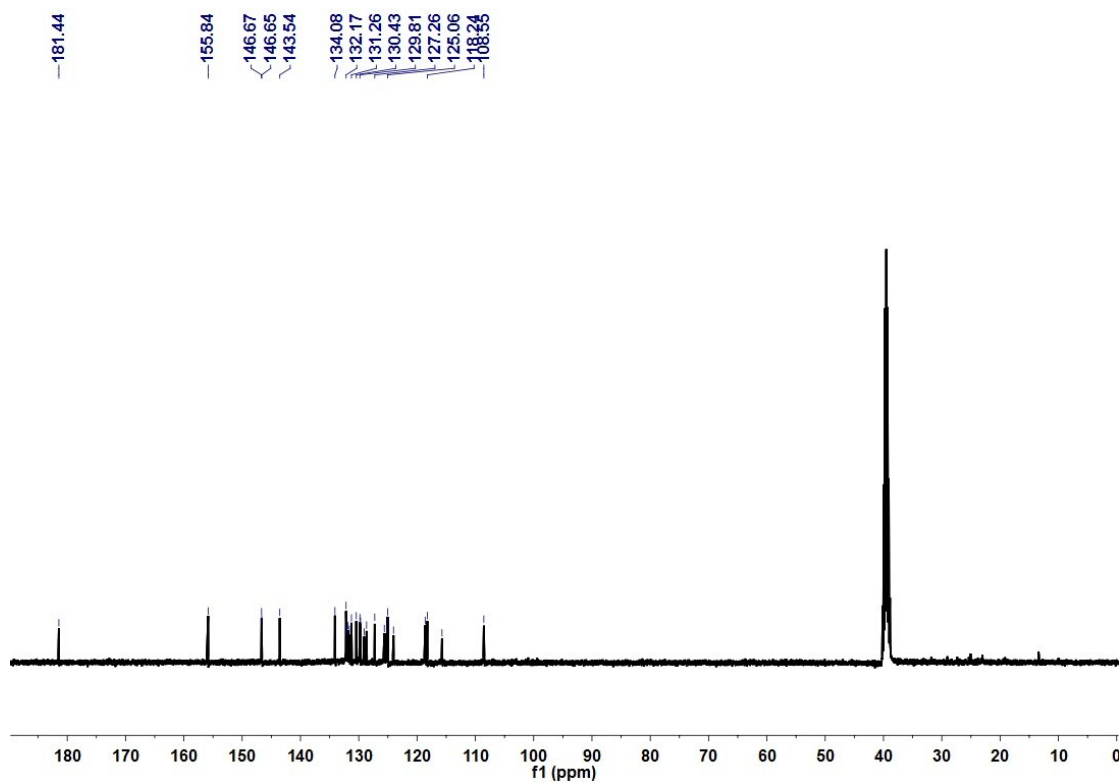

# Copy HRMS of Compound 6

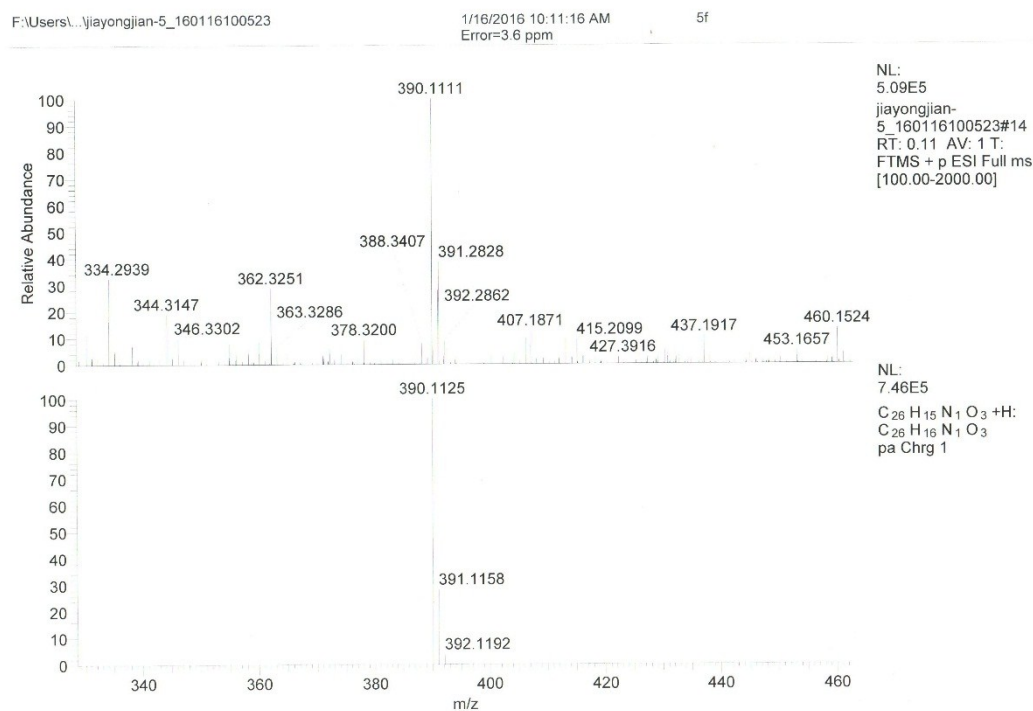

# Copy $^1\text{H}$ NMR of Compound 7

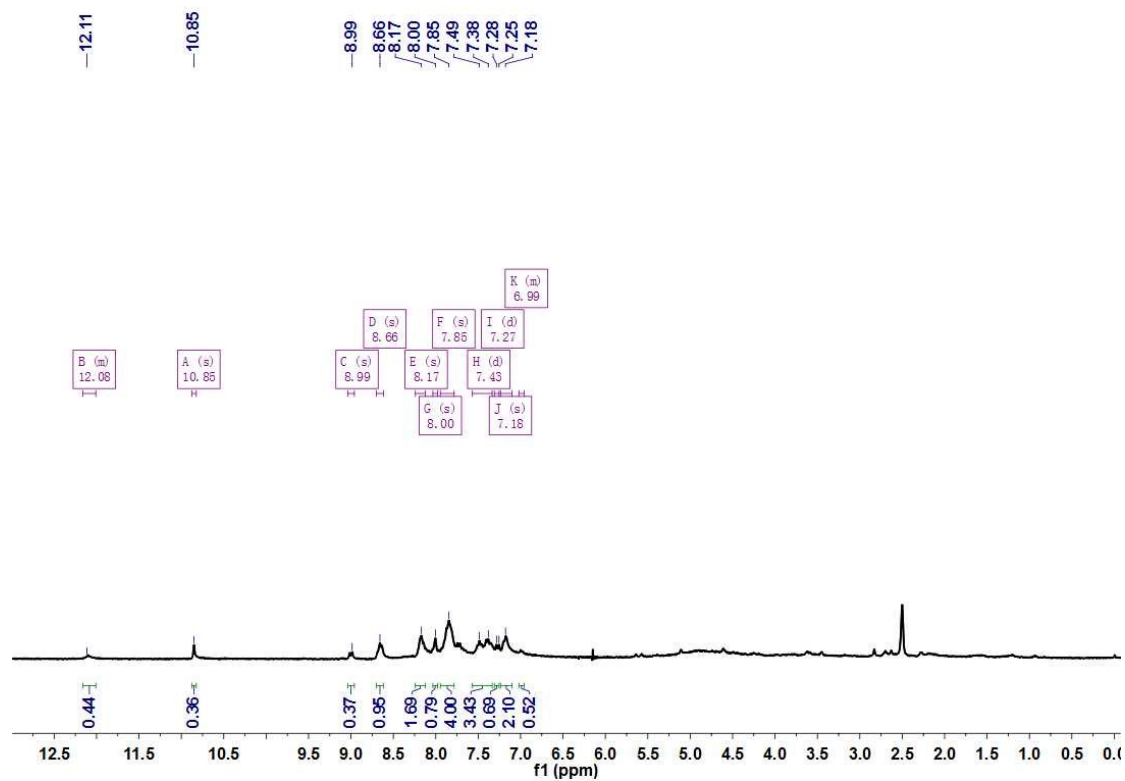

# Copy $^{13}\text{C}$ NMR of Compound 7

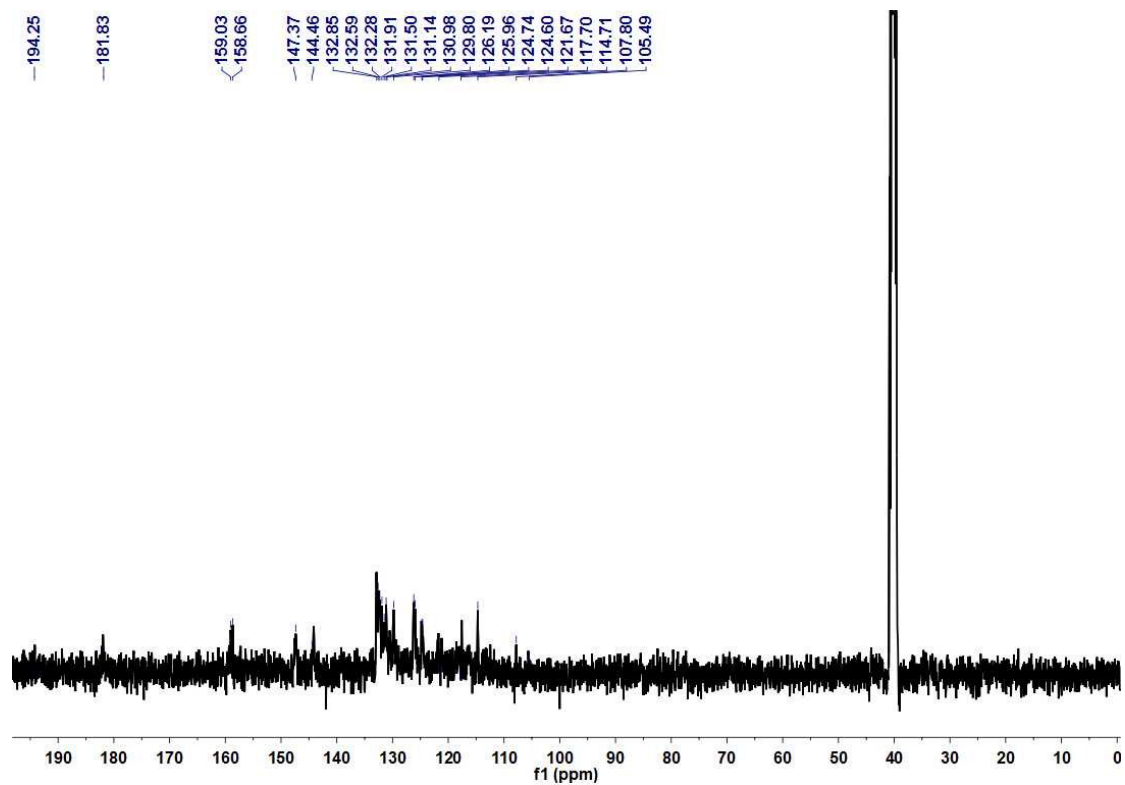

## Copy HRMS of Compound 7

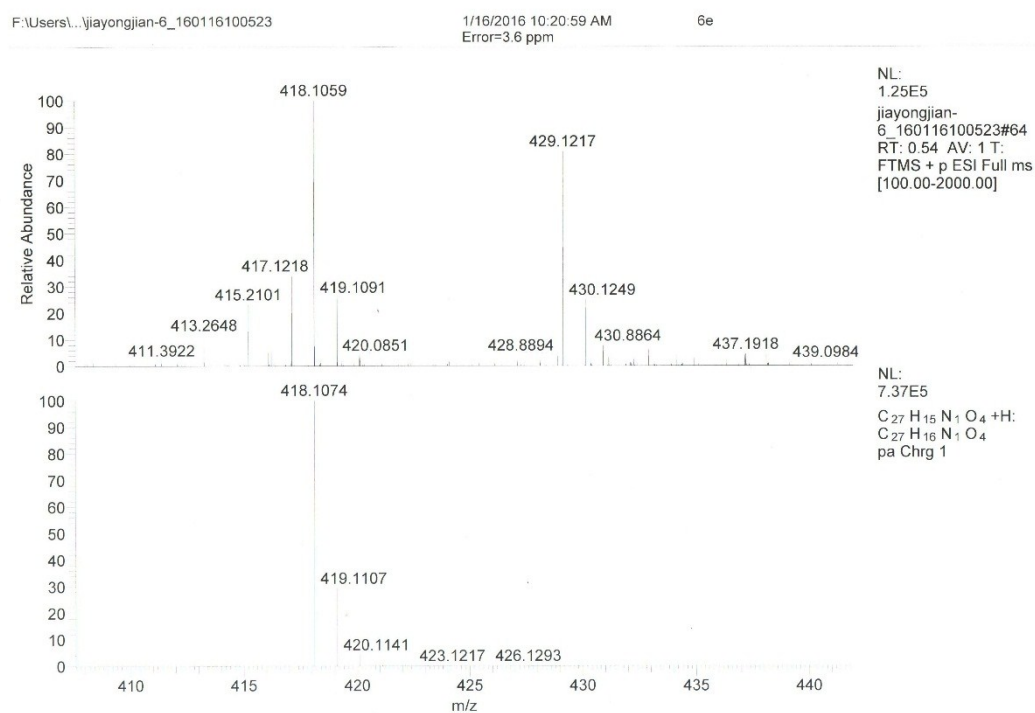

## Copy <sup>1</sup>H NMR of Compound 9

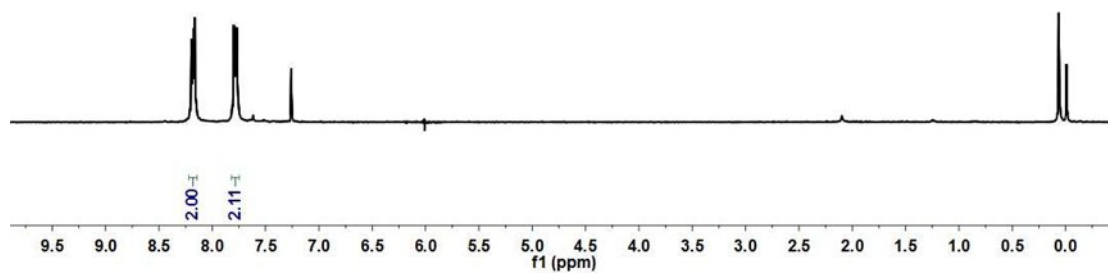

Copy  $^{13}\text{C}$  NMR of Compound 9

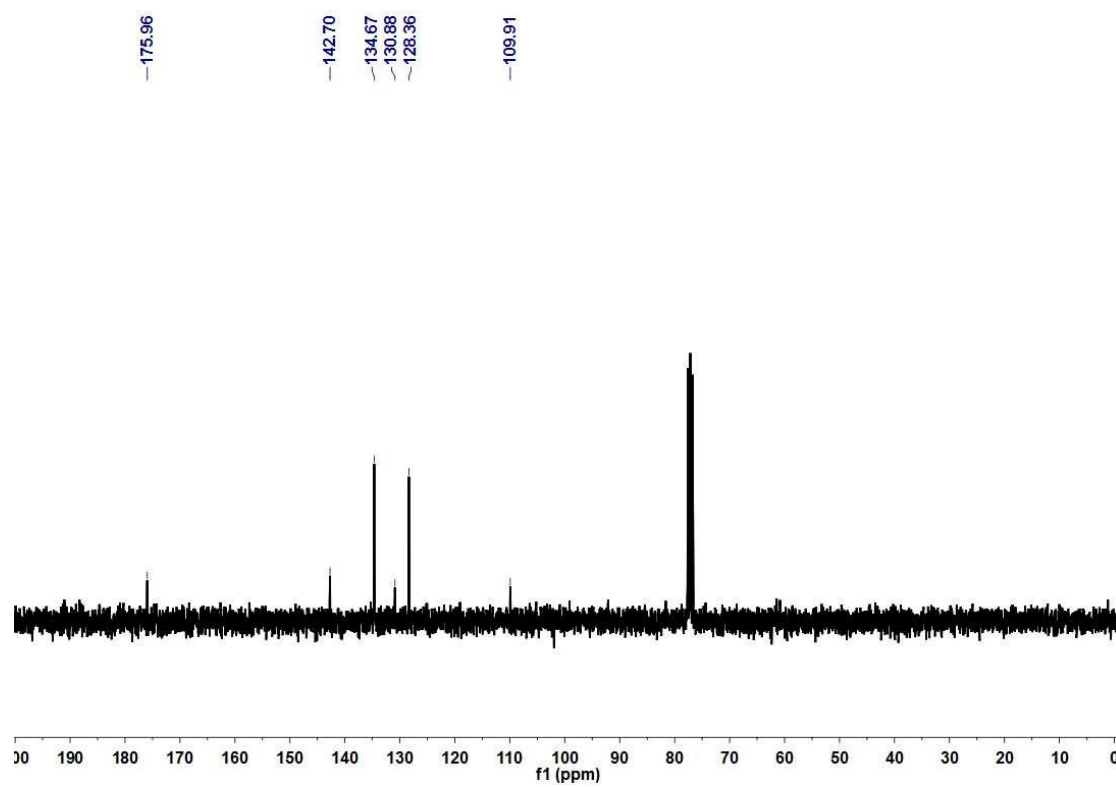

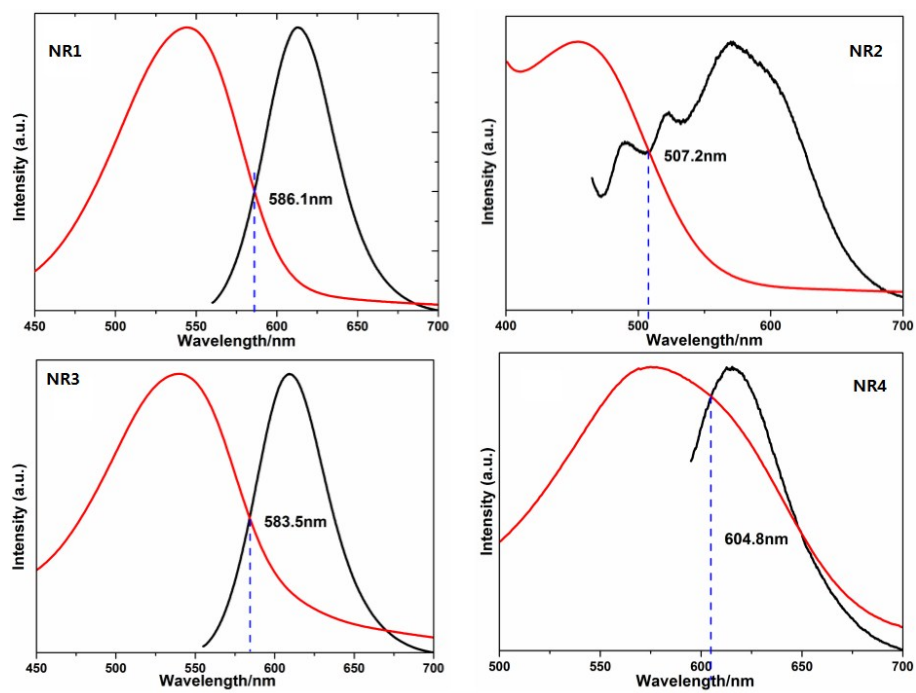

**Fig. S1** Normalized UV-*vis* absorption (red) & photoluminescence spectra (black) of NR*x* dyes in DMF at 25 °C

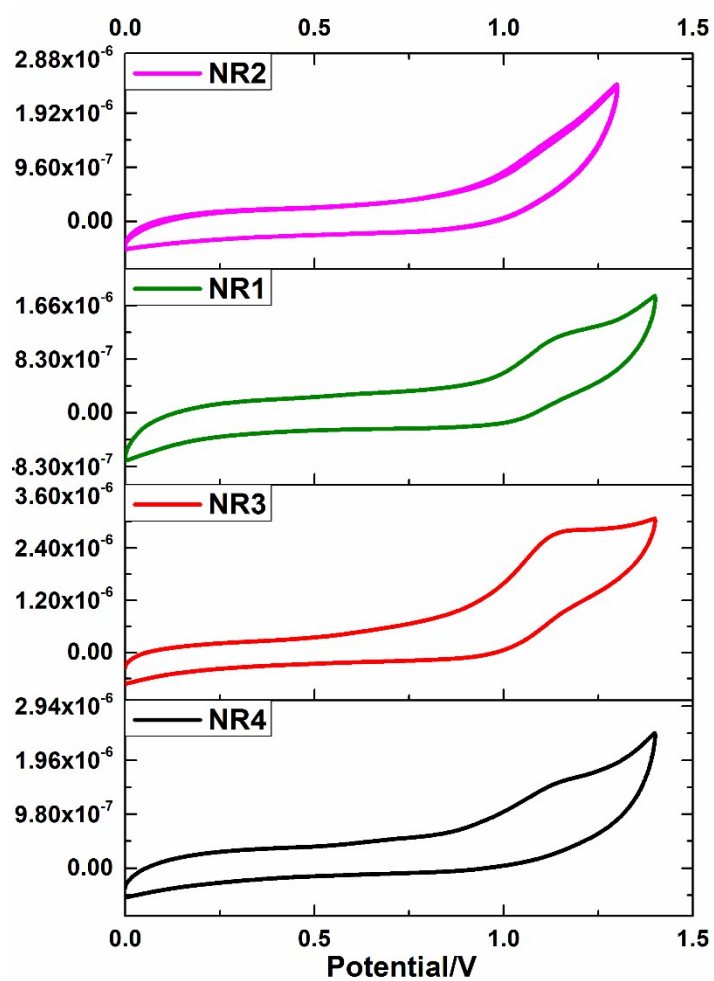

**Fig. S2** Cyclic voltammograms of NRx dyes

## DFT calculation

DFT calculations are performed using Gaussian 03 package. All the electronic structures for the optimized geometry are calculated at B3LYP/6-31G\*\*/B3LYP/6-31+G\* level.

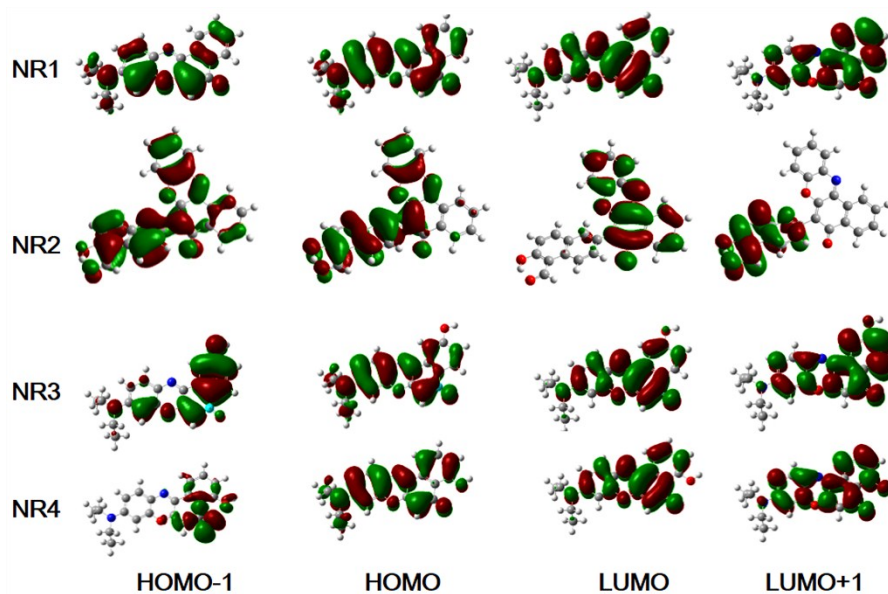

**Fig. S3** Electron distribution of frontier orbitals using DFT of NR<sub>x</sub> dyes

## Preparation of BiVO<sub>6</sub> (photoanode)

The preparation of anode, as a water oxidation electrode, were according to the literature [S7, S8].

## Preparation of Photocathodes

### a) Preparation of TiO<sub>2</sub>@FTO

The TiO<sub>2</sub> /FTO plates were fabricated by following our previous report [S9]

### b) Preparation of APTES@TiO<sub>2</sub>

The TiO<sub>2</sub> film was immersed in the ethanol solution containing 3-aminopropyltriethoxysilane (APTES), and then heated at 70°C for 12 hours. After cooling to room temperature, the film was washed with deionized water, dried and used in the next step.

### c) Preparation of NR<sub>x</sub>@TiO<sub>2</sub>

The plates of APTES@TiO<sub>2</sub> were dropped in the THF solution of **NR<sub>x</sub>** dyes, and refluxed for 24 hours. The dye molecules were reacted with amine groups of APTES@TiO<sub>2</sub> leading to the colored photocathodes of NR<sub>x</sub>@TiO<sub>2</sub> that were washed with THF and dried in air at 50 °C.

### d) Preparation of Pd/NR<sub>x</sub>@TiO<sub>2</sub>

The Pd nano-particles were sunken onto the surface of NR<sub>x</sub>@TiO<sub>2</sub> by pulse electron deposition technique. The electrolyte was PdCl<sub>2</sub> aqueous solution (2g L<sup>-1</sup>, pH = 1.5). The reference and auxiliary electrodes were a Pt wire.

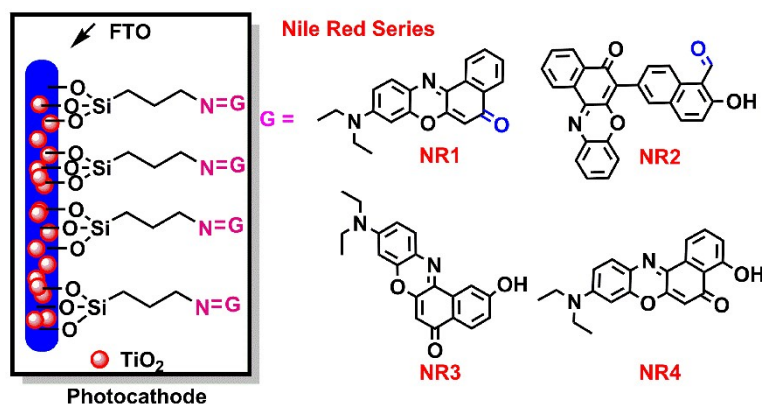

Fig. S4 the structure of photocathodes

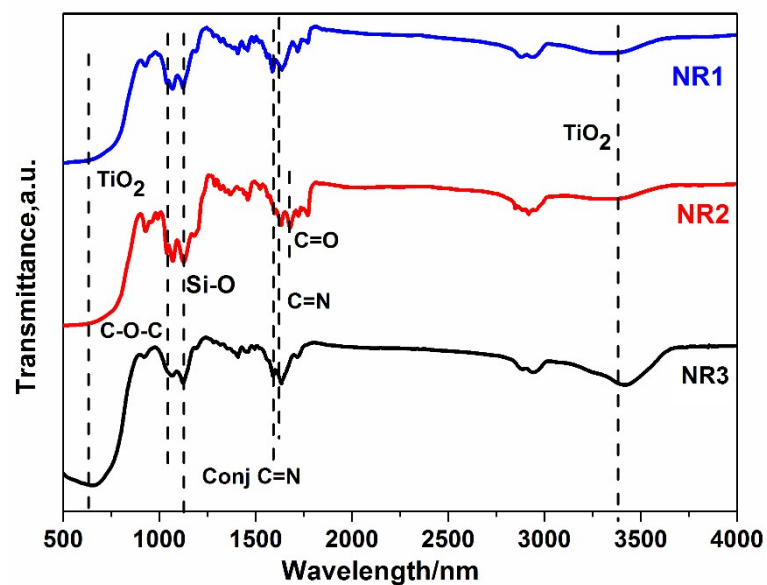

**Fig. S5** FTIR of organic and inorganic composites

1068  $\text{cm}^{-1}$ : Si-O stretching vibration; 1680  $\text{cm}^{-1}$ : C=N stretching vibration of Schiff base. 500  $\text{cm}^{-1}$  and 3200  $\text{cm}^{-1}$ : vibrations of  $\text{TiO}_2$ .

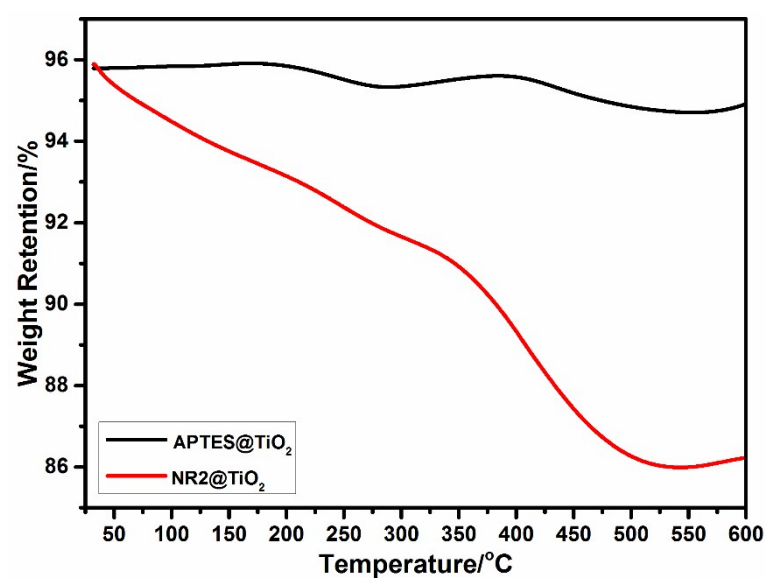

**Fig. S6** TGA of APTES@ $\text{TiO}_2$  (Black) and NR2@  $\text{TiO}_2$  (Red) Photocathodes

## Characterization of Photocathode (Pd/NR2@TiO<sub>2</sub>)

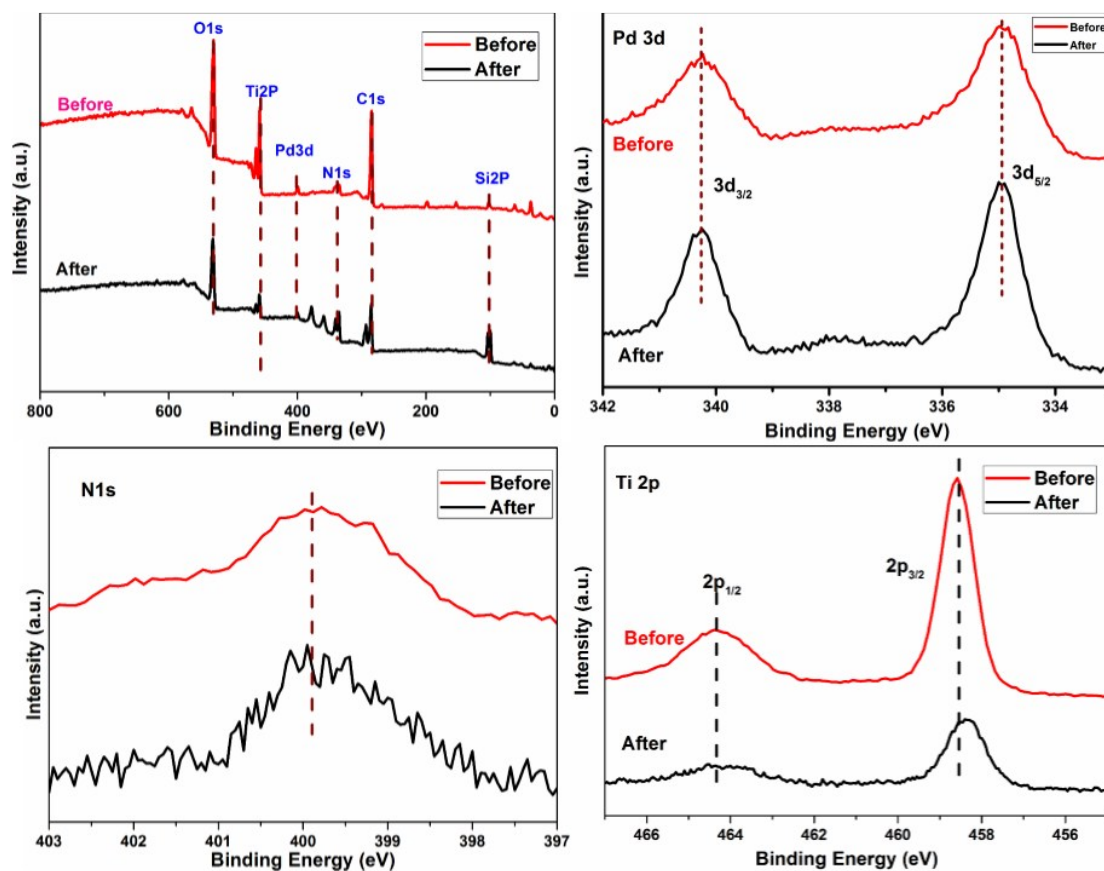

The binding energies of N 1s (397.2 eV), Ti 2p<sub>3/2</sub> (458.5 eV), Ti 2p<sub>1/2</sub> (464.3 eV), Pd 3d<sub>5/2</sub> (334.4 eV) and Pd 3d<sub>3/2</sub> (339.7 eV) are assigned to the C=N-C, Ti (IV) and Pd<sup>0</sup> respectively.

**Fig. S7** X-ray photoelectron spectroscopy (XPS) of Pd/NR2@TiO<sub>2</sub> photocathode before (red) and after (Black) artificial photosynthetic reaction

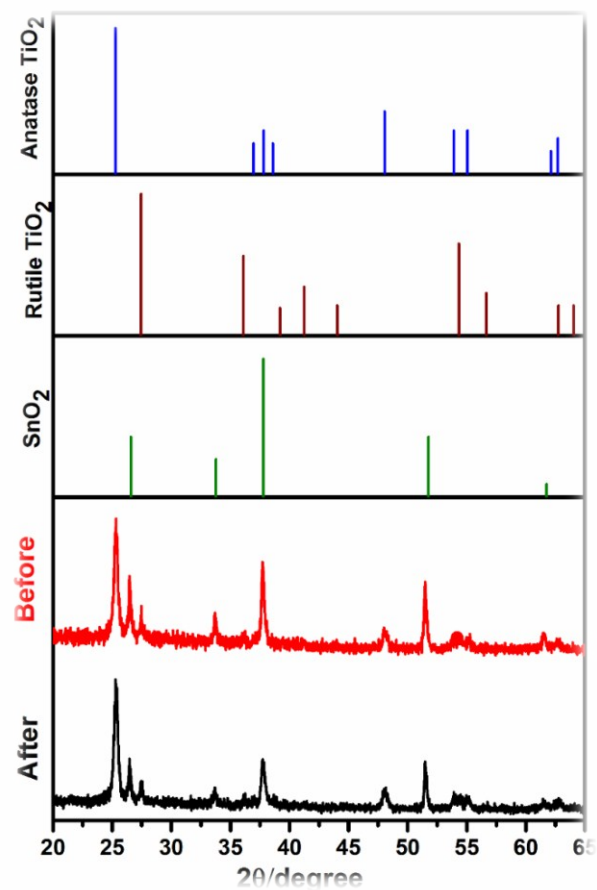

**Fig. S8** XRD patterns and analysis of Pd/NR2@TiO<sub>2</sub> photocathode before (Red) and after (Black) artificial photosynthetic reaction

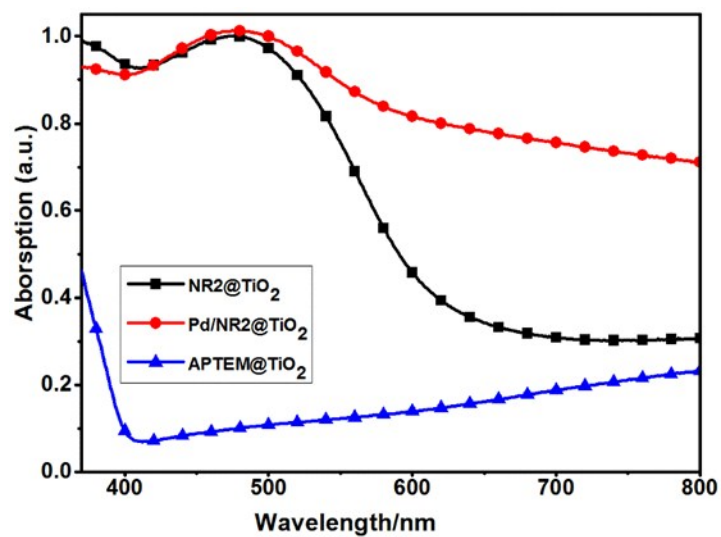

**Fig. S9** The UV-*vis* absorption of various reformative TiO<sub>2</sub> films

# Cyclic voltammetry and Electrochemical impedance spectra of trielectrode system

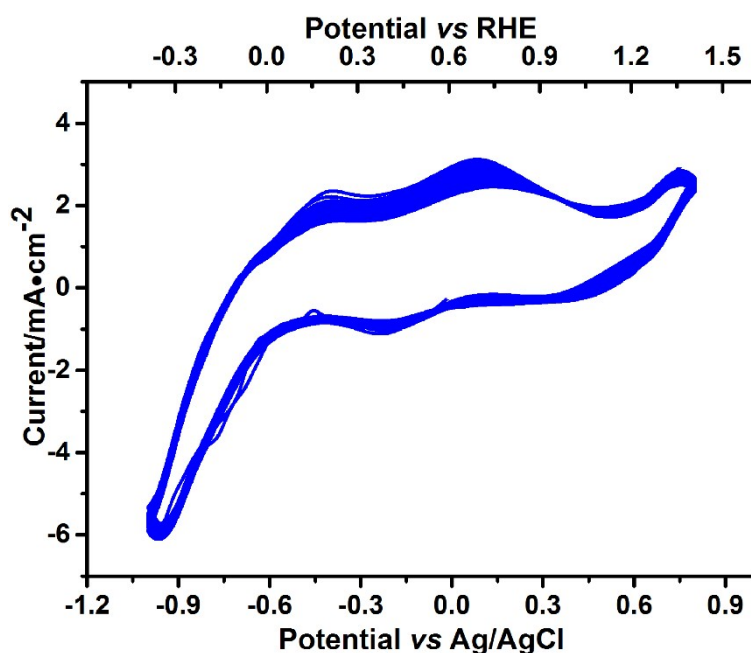

**Fig. S10** 100 continuous cyclic voltammograms of Pd/NR2@TiO<sub>2</sub> photocathode obtained at a scan rate of 50 mV s<sup>-1</sup> in CO<sub>2</sub> saturated KHCO<sub>3</sub> (0.1 M)

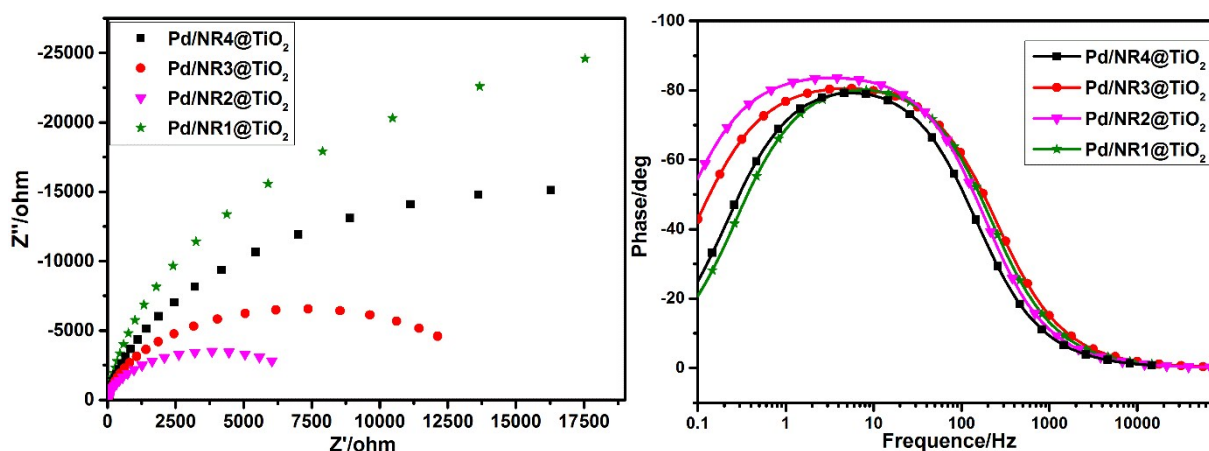

**Fig. S11** Nyquist and Bode plots of electrodes in a CO<sub>2</sub> sat 0.1 M. KHCO<sub>3</sub> solution (Ag/AgCl)

Electron life ( $\tau_n$ ) was calculated by the equation:

$$\tau_n = \frac{1}{2\pi f_m}$$

$f_m$  was locked at the peak value of frequency in Bode plots.

**Table S1** Electrochemical impedance results of Pd/NR<sub>x</sub>@TiO<sub>2</sub>.

| <b>Photocathode</b>     | <b>R<sub>ct</sub>/Ω</b> | <b>τ<sub>n</sub>/ms</b> |
|-------------------------|-------------------------|-------------------------|
| Pd/NR1@TiO <sub>2</sub> | 57513                   | 19                      |
| Pd/NR2@TiO <sub>2</sub> | 7672                    | 42                      |
| Pd/NR3@TiO <sub>2</sub> | 14321                   | 39                      |
| Pd/NR4@TiO <sub>2</sub> | 33900                   | 28                      |

## High resolution transmission electron microscopy (HRTEM) and TEM pictures

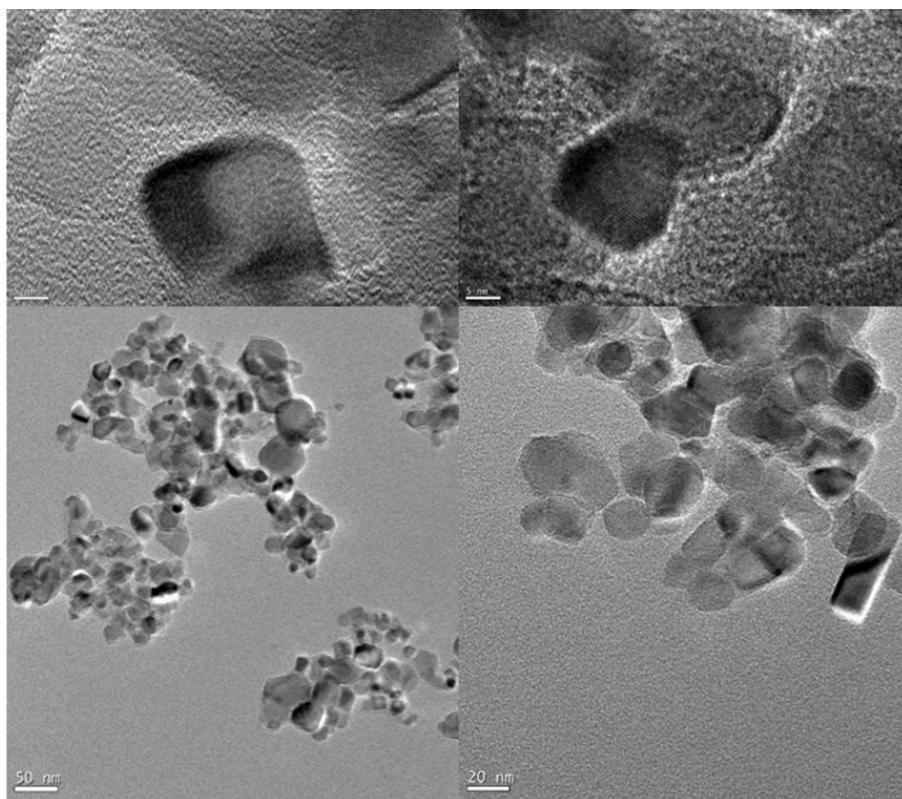

**Fig. S12** HRTEM and TEM images of Pd/NR2@TiO<sub>2</sub> Photocathode

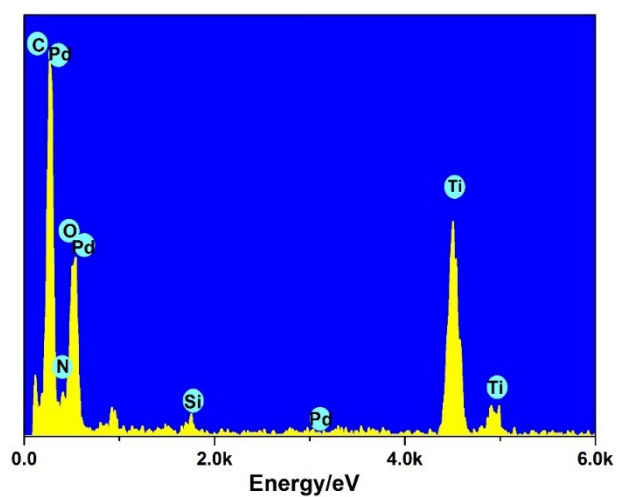

**Fig. S13** The element test of Pd/NR2@TiO<sub>2</sub> Photocathode by EDS

## Scanning electron microscopy Characterization

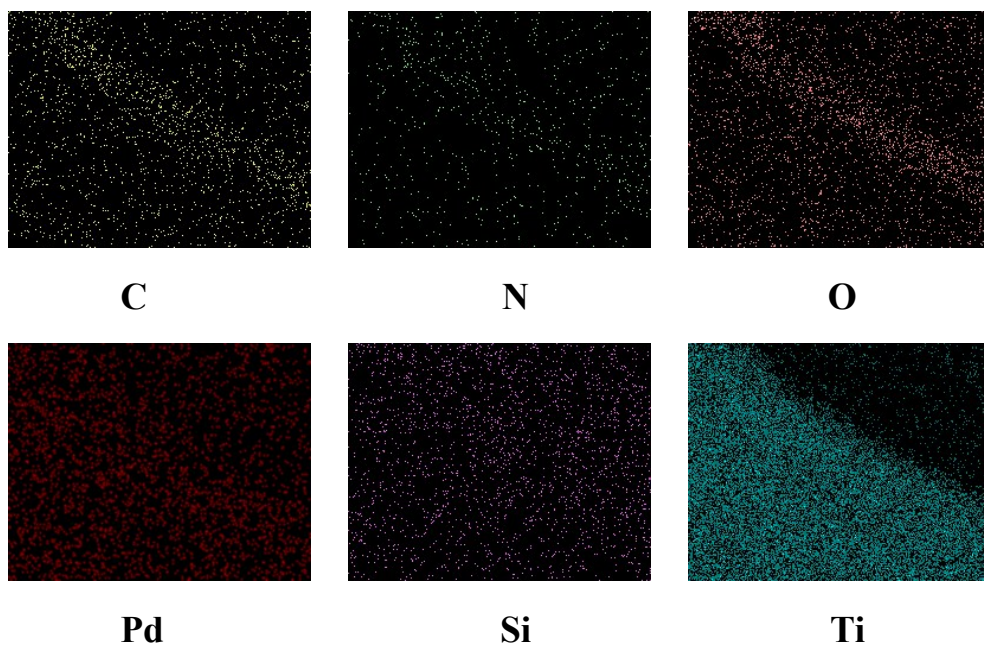

**Fig. S14.** Surface elements distribution of Pd/NR2@TiO<sub>2</sub> Photocathode

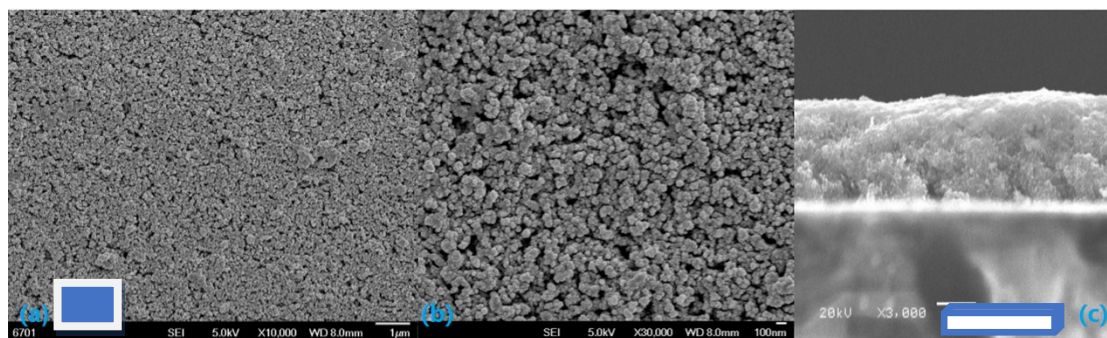

**Fig. S15.** SEM images (a, b, Top; c, Side) Pd/NR2@TiO<sub>2</sub> Photocathode

**Table S2** Average  $E_{fb}$  values and slopes obtained from Mott-Schottky plots

| Photocathode                         | $E_{fb}$ (vs Ag/AgCl) | $E_{fb}$ (vs NHE) | Carrier Concentration( $N_D$ )         |
|--------------------------------------|-----------------------|-------------------|----------------------------------------|
| <b><i>Pd/NR1@TiO<sub>2</sub></i></b> | −0.58 V               | −0.38V            | $0.94 \times 10^{19} \text{ cm}^{-3}$  |
| <b><i>Pd/NR2@TiO<sub>2</sub></i></b> | −0.72 V               | −0.52V            | $1.098 \times 10^{19} \text{ cm}^{-3}$ |

$$E \text{ (vs. NHE)} = E_{fb} \text{ (vs. Ag/AgCl)} + 0.197\text{V}$$

$$E \text{ (vs RHE)} = E \text{ (vs Ag/AgCl)} + E_{Ag/AgCl}(\text{ref}) + 0.0596\text{pH}$$

$$ND = \frac{2}{r\epsilon_0\epsilon_r e}$$

The flat band potential was obtained by the Mott–Schottky analysis method at a scanning rate  $10 \text{ mV} \cdot \text{s}^{-1}$  with the potential range from  $-1$  to  $0 \text{ V}$  at  $0.5 \text{ kHz}$  under dark condition.

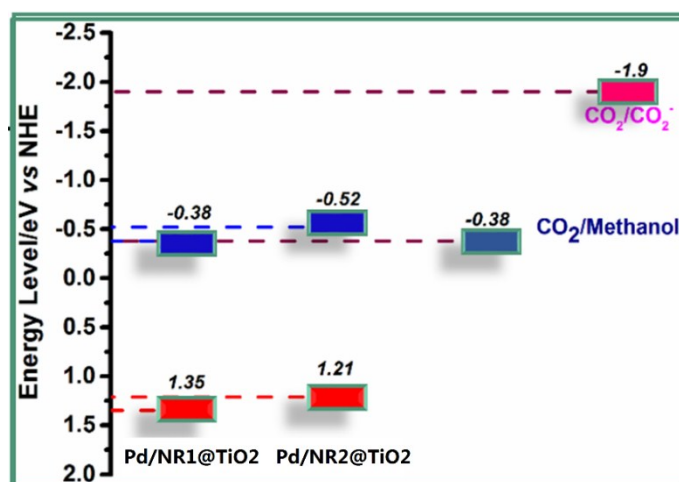

**Fig. S16** A diagram showing approximate band edge positions for Pd/NR<sub>x</sub>@TiO<sub>2</sub> together with the thermodynamic potentials of CO<sub>2</sub> reduction to various reduction products vs. NHE at pH7.

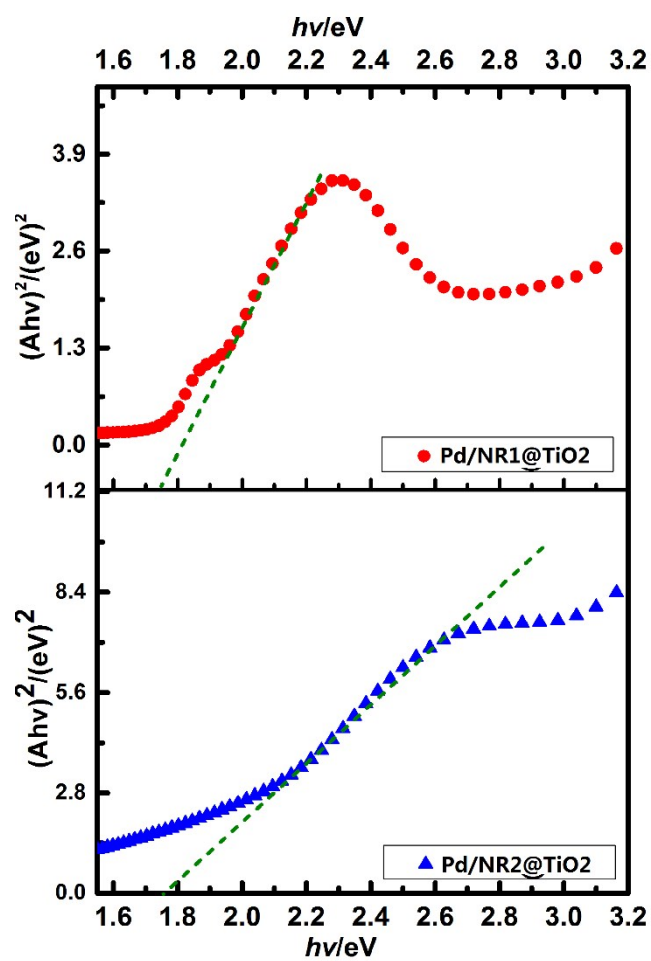

**Fig. S17**  $(Ah\nu)^2$  vs.  $h\nu$  curves of Pd/NR<sub>x</sub>@TiO<sub>2</sub> photocathode

**Table S3** CB and VB of Pd/NR<sub>x</sub>@TiO<sub>2</sub>

| Photocathode            | CB(eV) vs. <i>NHE</i> | VB(eV) vs. <i>NHE</i> |
|-------------------------|-----------------------|-----------------------|
| Pd/NR1@TiO <sub>2</sub> | <b>-0.38</b>          | <b>1.35</b>           |
| Pd/NR2@TiO <sub>2</sub> | <b>-0.52</b>          | <b>1.21</b>           |

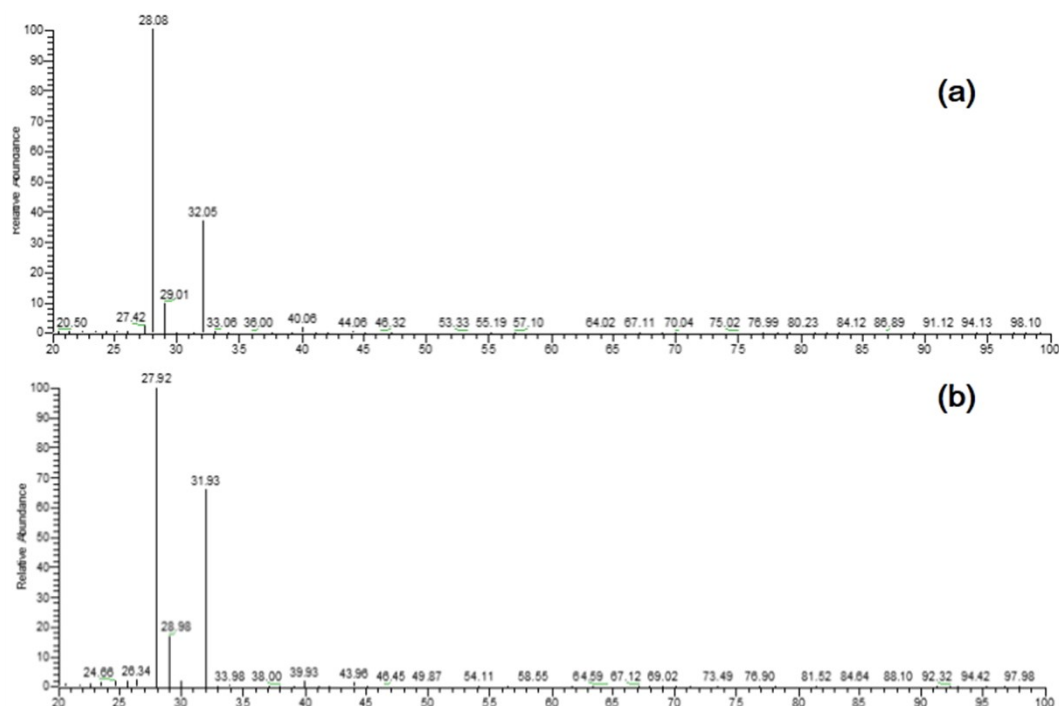

**Fig. S18** Trace Oxygen Evolution utilizing Pd/NR2@TiO<sub>2</sub> for 48h. (a) GC-MS of Background and (b) GC-MS of the upper gas in APE system.

According to mass spectrum, N/O ratio of the instrument background was locked at 2.7, while that of sample was 14.28. It manifest the photosystem II of PC system using the energy in sunlight to oxidize water work to liberate oxygen.

## Artificial photosynthetic experiments

Artificial photosynthetic experiments were performed as follows: an airtight reactor equipped with a multi-modificatory  $\text{TiO}_2$  as photocathode,  $\text{Co/Pi/W:BiVO}_4$  as photoanode was charged with  $\text{KHCO}_3$  aqueous solution (0.1M,). The mixture was bubbled and saturated with a stream of high-purity Carbon Dioxide (99.999%) (pH = 6.96). The reactor was irradiated by a 300W Xenon lamp (PLS-SXE300C, Perfect Light, China), meanwhile, the tiny voltage ( $\sim 0.6\text{V}$ ) was actuated between the photoanode and photocathode by a silicon cell. The liquid products were quantified by NMR (JOEL 400 MHz) spectroscopy, in which appropriate electrolyte was mixed with 35  $\mu\text{l}$  standard liquid (1ml  $\text{D}_2\text{O}$ + 10mM dimethyl sulfoxide + 50mM phloroglucinol). The one-dimensional  $^1\text{H}$  spectrum was measured with water suppression using a pre-saturation method.

$$\text{Rate} = \frac{C_{\text{DMSO}} (\text{mM}) \times \text{Area}_{\text{product}}}{\text{Time}(\text{h}) \times 1.96(\text{cm}^{-2})}$$

$$\Phi_{\text{cell}} = \frac{6 \times \text{moles of methanol yeilds}}{\text{moles of photon absorbed by catalyst}}$$

Total photon absorbed by catalysis

$$\frac{\text{absorbed light flux} \left( \frac{\text{mW}}{\text{cm}^2} \right) \times \text{surface area}(\text{cm}^2) \times \text{radiation time}(\text{s})}{\text{each photon energy}(\text{J}) \times 6.02 \times 10^{23}}$$

$$\text{Each photon energy: } E = \frac{hc}{\lambda}$$

Planck's constant  $h = 6.626 \times 10^{-34} \text{ J}\cdot\text{s}$ ,  $c = 3 \times 10^8 \text{ m/s}$ ,  $\lambda \cong 500 \text{ nm}$ .

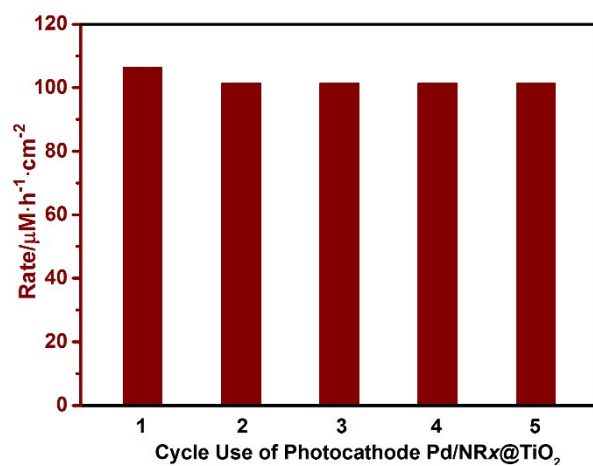

**Fig S19** Stability of photocathode Pd/NR<sub>2</sub>@TiO<sub>2</sub> in APE

## Selected copies of $^1\text{H}$ NMR spectra of Artificial Photoelectric experiments

$\text{Pd/NR2@TiO}_2\text{-4h}$

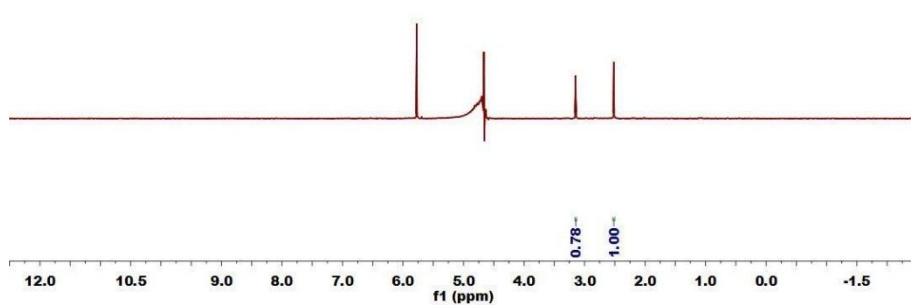

$\text{Pd/NR3@TiO}_2$

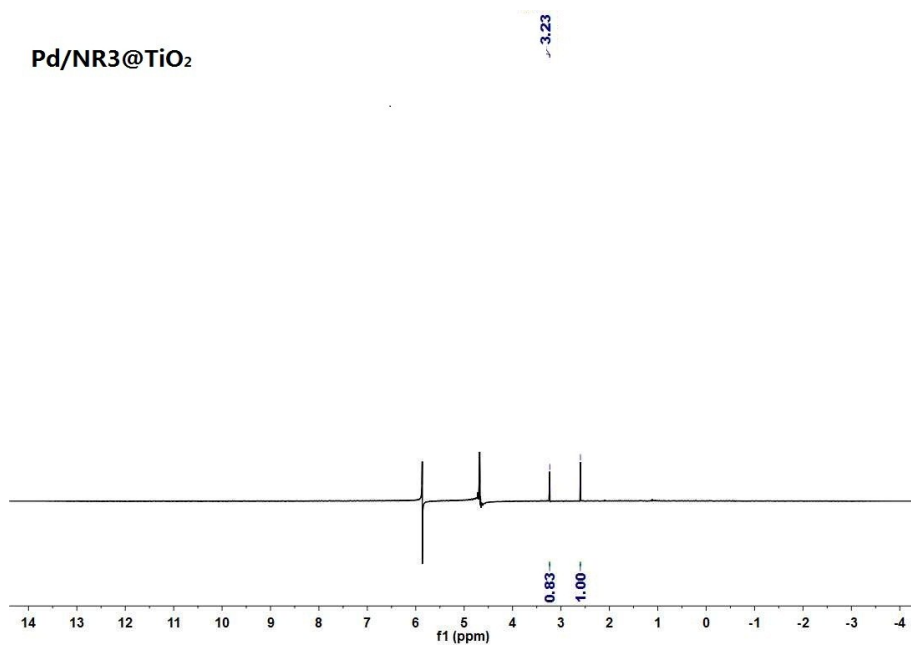

Pd/NR4@TiO<sub>2</sub>

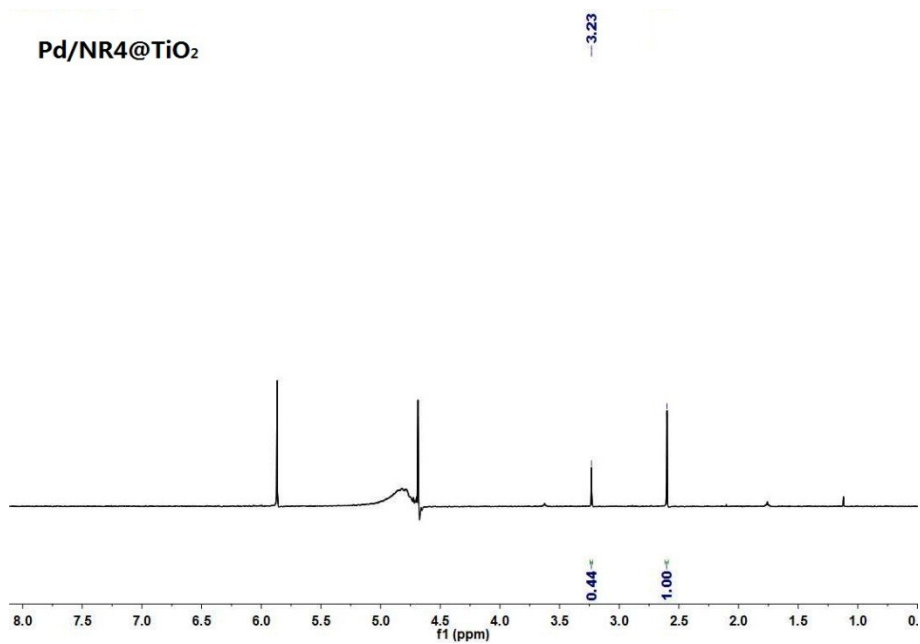

Pd/NR1@TiO<sub>2</sub>-26h

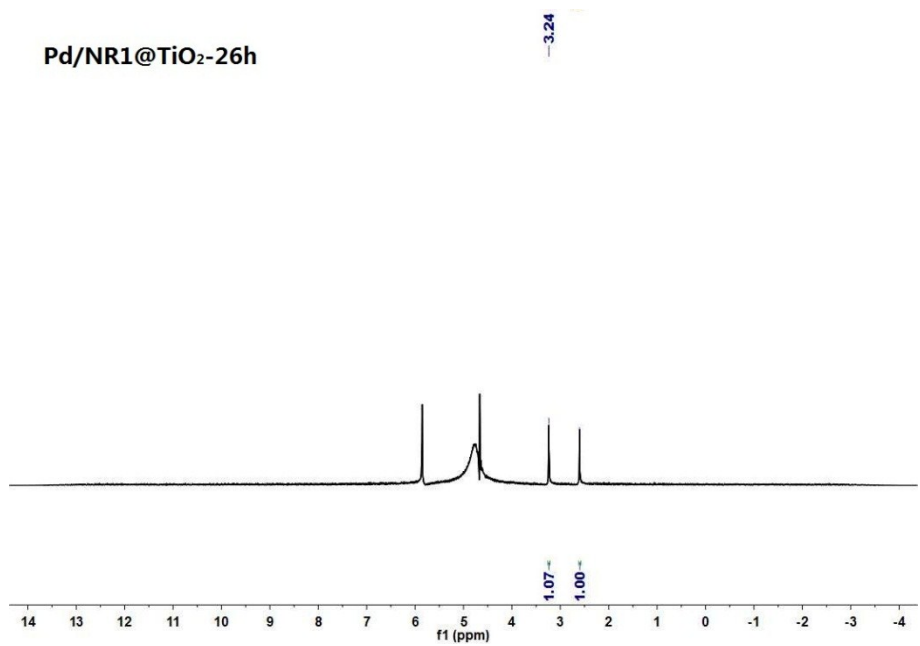

## References:

- [S1] Chen, W.; Shen, Y.; Li, Z. Y.; Zhang, M. R.; Lu, C. H. and Shen Y. M. Design and synthesis of 2-phenylnaphthalenoids as inhibitors of DNA topoisomerase II $\alpha$  and antitumor agents. *European J of Medicinal Chem* 2014, 86, 782-796.
- [S2] Pan, J; Chen, M. F.; Warner, W.; He, M. Q.; Dalton, L.; and Hogen-Esch, T. E. Synthesis and Self-Assembly of Diblock Copolymers through Hydrogen Bonding. Semiquantitative Determination of Binding Constants. *Macromolecules*, 2000, 33, 7835–7841.
- [S3] Khrystyna B., Omar K., Svyatoslav P., Volodymyr N., Thierry T. and Patrice V.; Novel Synthesis of 5-Substituted 5H-Benzo[b]carbazole-6, 11-diones via Double Buchwald–Hartwig Reaction. *Synlett* 2014, 25, 2765-2768.
- [S4] Ravichandiran, P.; Jegan, A.; Premnath, D.; Periasamy, V. S. and Vasanthkumar, S. Design, synthesis, molecular docking as histone deacetylase (HDAC8) inhibitors, cytotoxicity and antibacterial evaluation of novel 6-(4-(4-aminophenylsulfonyl)phenylamino)-5Hbenzo[a]phenoxazin-5-one derivatives. *Med Chem Res* 2015, 24, 197–208.
- [S5] Anuratha, M.; Jawahar, A.; Umadevi, M.; Sathe, V. G.; Vanelle, P.; Terme, T.; Meenakumari, V.; Milton Franklin Benial, A. SERS investigations of 2,3-dibromo-1,4-naphthoquinone on silver nanoparticles. *Spectrochimica Acta Part A: Molecular and Biomolecular Spectroscopy* 2013, 105, 218–222.
- [S6] Liu, S. L.; Sheng, R.; O'Connor, M. J.; Cui, Y.; Yoon, Y.; Kurilova, S.; Lee, D. and Cho, W. Simultaneous In Situ Quantification of Two Cellular Lipid Pools Using Orthogonal Fluorescent Sensors. *Angew. Chem. Int. Ed.* 2014, 53, 14387-14391.
- [S7] (a), Seabold, J. A.; Choi, K. S. Efficient and Stable Photo-Oxidation of Water by a Bismuth Vanadate Photoanode Coupled with an Iron Oxyhydroxide Oxygen Evolution Catalyst. *J. Am. Chem. Soc.* 2012, 134, 2186–2192; (b), Kim, T. W.; Choi, K. S. Nanoporous BiVO<sub>4</sub> Photoanodes with Dual-Layer Oxygen Evolution Catalysts for Solar Water Splitting. *Science*, 2014, 343, 990-994; (c), Cho, S. K.; Park, H. S.; Lee, H. C.; Nam, K. M.; Bard, A. J. Metal Doping of BiVO<sub>4</sub> by Composite Electrodeposition with Improved Photoelectrochemical Water Oxidation. *J. Phy. Chem. C*. 2013, 117, 23048-23056.
- [S8] Kanan, M. W., Nocera, D. G. In situ formation of an oxygen-evolving catalyst in neutral water containing phosphate and Co<sup>2+</sup>. *Science* 2008, 321, 1072–1075.
- [S9] Gou, F. L.; Jiang X.; Fang, R.; Jing, H. W. and Zhu Z. P.; Strategy to Improve Photovoltaic Performance of DSSC Sensitized by Zinc Porphyrin Using Salicylic Acid as a Tridentate Anchoring Group. *ACS Appl. Mater. Interfaces* 2014, 6, 6697–6703.
